# Supplementary material for: Using provider–parent strategies to improve influenza vaccination in children and adolescents with special risk medical conditions: a randomised controlled trial protocol
Source: PubMed Central journal article supplement — BMJ Open. 2022 Feb 10;12(2):e053838. doi: 10.1136/bmjopen-2021-053838 (PMC8845172; doi:10.1136/bmjopen-2021-053838), 2022-02-10
Supplement: bmjopen-2021-053838.draft_revisions.pdf [file bmjopen-2021-053838.draft_revisions.pdf]

# BMJ Open

BMJ Open is committed to open peer review. As part of this commitment we make the peer review history of every article we publish publicly available.

When an article is published we post the peer reviewers' comments and the authors' responses online. We also post the versions of the paper that were used during peer review. These are the versions that the peer review comments apply to.

The versions of the paper that follow are the versions that were submitted during the peer review process. They are not the versions of record or the final published versions. They should not be cited or distributed as the published version of this manuscript.

BMJ Open is an open access journal and the full, final, typeset and author-corrected version of record of the manuscript is available on our site with no access controls, subscription charges or pay-per-view fees (<http://bmjopen.bmj.com>).

If you have any questions on BMJ Open's open peer review process please email [info.bmjopen@bmj.com](mailto:info.bmjopen@bmj.com)

# BMJ Open

## Utilising provider-parent strategies to improve influenza vaccination in children and adolescents with special risk medical conditions: a randomised controlled trial protocol

|                               |                                                                                                                                                                                                                                                                                                                                                                                                                                                                                                                                                                                                                                                                                                                                                                                                                                                                                                                                                                                                                                                                                                                                                                                                                                                                                                                                                                                                                                                                                                                                                                                                                                                                                                                                                                                                                                                                                                               |
|-------------------------------|---------------------------------------------------------------------------------------------------------------------------------------------------------------------------------------------------------------------------------------------------------------------------------------------------------------------------------------------------------------------------------------------------------------------------------------------------------------------------------------------------------------------------------------------------------------------------------------------------------------------------------------------------------------------------------------------------------------------------------------------------------------------------------------------------------------------------------------------------------------------------------------------------------------------------------------------------------------------------------------------------------------------------------------------------------------------------------------------------------------------------------------------------------------------------------------------------------------------------------------------------------------------------------------------------------------------------------------------------------------------------------------------------------------------------------------------------------------------------------------------------------------------------------------------------------------------------------------------------------------------------------------------------------------------------------------------------------------------------------------------------------------------------------------------------------------------------------------------------------------------------------------------------------------|
| Journal:                      | <i>BMJ Open</i>                                                                                                                                                                                                                                                                                                                                                                                                                                                                                                                                                                                                                                                                                                                                                                                                                                                                                                                                                                                                                                                                                                                                                                                                                                                                                                                                                                                                                                                                                                                                                                                                                                                                                                                                                                                                                                                                                               |
| Manuscript ID                 | bmjopen-2021-053838                                                                                                                                                                                                                                                                                                                                                                                                                                                                                                                                                                                                                                                                                                                                                                                                                                                                                                                                                                                                                                                                                                                                                                                                                                                                                                                                                                                                                                                                                                                                                                                                                                                                                                                                                                                                                                                                                           |
| Article Type:                 | Protocol                                                                                                                                                                                                                                                                                                                                                                                                                                                                                                                                                                                                                                                                                                                                                                                                                                                                                                                                                                                                                                                                                                                                                                                                                                                                                                                                                                                                                                                                                                                                                                                                                                                                                                                                                                                                                                                                                                      |
| Date Submitted by the Author: | 26-May-2021                                                                                                                                                                                                                                                                                                                                                                                                                                                                                                                                                                                                                                                                                                                                                                                                                                                                                                                                                                                                                                                                                                                                                                                                                                                                                                                                                                                                                                                                                                                                                                                                                                                                                                                                                                                                                                                                                                   |
| Complete List of Authors:     | <p>TUCKERMAN, Jane; The University of Adelaide Adelaide Medical School, Adelaide Medical School; Murdoch Children's Research Institute and Faculty of Medicine, Dentistry and Health Sciences, University of Melbourne</p> <p>Harper, Kelly ; Women's and Children's Health Network; The University of Adelaide, Robinson Research Institute</p> <p>Sullivan, Thomas; South Australian Health and Medical Research Institute; University of Adelaide, School of Public Health</p> <p>Fereday, Jenny; Women's and Children's Health Network</p> <p>Couper, Jennifer; The University of Adelaide, Robinson Research Institute</p> <p>Smith, Nicholas; University of Adelaide, Adelaide Medical School; Women's and Children's Health Network</p> <p>Tai, Andrew; Women's and Children's Health Network; The University of Adelaide, Robinson Research Institute</p> <p>Kelly, Andrew; University of Adelaide, Adelaide Medical School; Women's and Children's Health Network</p> <p>Couper, Richard; Women's and Children's Health Network</p> <p>Friswell, Mark; Women's and Children's Health Network</p> <p>Flood, Louise; South Australian Department of Health and Wellbeing, Communicable Disease Control Branch</p> <p>Danchin, Margaret; Murdoch Children's Research Institute and Faculty of Medicine, Dentistry and Health Sciences, University of Melbourne ; The Royal Children's Hospital Melbourne, Department of General Medicine</p> <p>Blyth, Christopher C.; Univ Western Australia, Wesfarmers Centre of Vaccines and Infectious Diseases, Telethon Kids Institute and School of Medicine; Department of Infectious Diseases, Perth Children's Hospital and Department of Microbiology, PathWest Laboratory Medicine, QEII medical centre</p> <p>Marshall, Helen; University of Adelaide, Robinson Research Institute and Adelaide Medical School; Women's and Children's Health Network</p> |
| Keywords:                     | Paediatric infectious disease & immunisation < PAEDIATRICS, Public health < INFECTIOUS DISEASES, Protocols & guidelines < HEALTH SERVICES ADMINISTRATION & MANAGEMENT, PREVENTIVE MEDICINE                                                                                                                                                                                                                                                                                                                                                                                                                                                                                                                                                                                                                                                                                                                                                                                                                                                                                                                                                                                                                                                                                                                                                                                                                                                                                                                                                                                                                                                                                                                                                                                                                                                                                                                    |
|                               |                                                                                                                                                                                                                                                                                                                                                                                                                                                                                                                                                                                                                                                                                                                                                                                                                                                                                                                                                                                                                                                                                                                                                                                                                                                                                                                                                                                                                                                                                                                                                                                                                                                                                                                                                                                                                                                                                                               |

1  
2  
3  
4  
5  
6  
7  
8  
9  
10  
11  
12  
13  
14  
15  
16  
17  
18  
19  
20  
21  
22  
23  
24  
25  
26  
27  
28  
29  
30  
31  
32  
33  
34  
35  
36  
37  
38  
39  
40  
41  
42  
43  
44  
45  
46  
47  
48  
49  
50  
51  
52  
53  
54  
55  
56  
57  
58  
59  
60

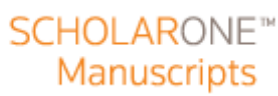

1  
2  
3  
4  
5  
6  
7  
8  
9  
10  
11  
12  
13  
14  
15  
16  
17  
18  
19  
20  
21  
22

## Utilising provider-parent strategies to improve influenza vaccination in children and adolescents with special risk medical conditions: a randomised controlled trial protocol

### Authors

Jane Tuckerman<sup>1,2,3</sup>, Kelly Harper<sup>4,5</sup>, Thomas Sullivan<sup>6,7</sup>, Jenny Fereday<sup>4</sup>, Jennifer Couper<sup>5</sup>, Nicholas Smith<sup>1,4</sup>, Andrew Tai<sup>4,5</sup>, Andrew Kelly<sup>1,4</sup>, Richard Couper<sup>4</sup>, Mark Friswell<sup>4</sup>, Louise Flood<sup>8</sup>, Margaret Danchin<sup>2,3,9</sup>, Christopher C Blyth<sup>10,11,12</sup>, Helen Marshall<sup>1,4,5</sup>

### Affiliations

1. Adelaide Medical School, University of Adelaide, South Australia, Australia
2. Murdoch Children's Research Institute, Melbourne, Australia
3. University of Melbourne, Melbourne, Australia
4. Women's and Children's Health Network, North Adelaide, Australia
5. Robinson Research Institute, University of Adelaide, South Australia, Australia
6. SAHMRI Women & Kids, South Australian Health & Medical Research Institute, South Australia, Australia.
7. School of Public Health, University of Adelaide, South Australia, Australia.
8. Communicable Disease Control Branch, South Australian Department of Health and Wellbeing, Adelaide, Australia
9. Department of General Medicine, The Royal Children's Hospital, Melbourne
10. Wesfarmers Centre of Vaccines and Infectious Diseases, Telethon Kids Institute and School of Medicine, University of Western Australia
11. Department of Infectious Diseases, Perth Children's Hospital, Perth, Western Australia
12. Department of Microbiology, PathWest Laboratory Medicine, QEII medical centre

### Corresponding author

1  
2 Dr Jane Tuckerman  
3  
4 Murdoch Children's Research Institute  
5  
6 Royal Children's Hospital,  
7  
8 50 Flemington Road,  
9  
10 Parkville 3052  
11  
12 AUSTRALIA  
13  
14 Email: jane.tuckerman@mcri.edu.au  
15  
16  
17  
18  
19  
20  
21  
22  
23  
24  
25  
26  
27  
28  
29  
30  
31  
32  
33  
34  
35  
36  
37  
38  
39  
40  
41  
42  
43  
44  
45  
46  
47  
48  
49  
50  
51  
52  
53  
54  
55  
56  
57  
58  
59  
60

For peer review only

## Abstract

### Introduction

Influenza immunisation is a highly cost-effective public health intervention. Despite a comprehensive National Immunisation Program, influenza vaccination in children and adolescents with special risk medical conditions (SRMC) is suboptimal. Flutext-4U is an innovative, multi-component strategy targeting paediatric hospitals, general practice, and parents of children and adolescents with SRMC. The Flutext-4U study aims to assess the impact of Flutext-4U to increase influenza immunisation in children and adolescents with SRMC.

### Methods and analysis

This is a randomised controlled trial involving parents of children and adolescents (aged >6 months to <18 years) with SRMC receiving tertiary care at the Women's and Children's Hospital (WCH), Adelaide, South Australia, who are eligible for funded influenza immunisation with a hospital appointment between the start of the seasonal influenza vaccination season and 31 July 2021, their treating general practitioners (GP), and WCH paediatric specialists.

Parents (of children/adolescents with SRMC) are randomised (1:1 ratio) to standard care plus intervention (SMS reminder messages to parents; reminders (written correspondence) for their child's GP from the hospital's Paediatric Outpatients Department) or standard care (hospital vaccine availability, ease of access and reminders for WCH sub-specialists) with randomisation stratified by age-group (<5, 5-14, >14 to <18 years).

The primary outcome is influenza vaccination, as confirmed by the Australian Immunisation Register (AIR).

1  
2  
3  
4 The proportion vaccinated (primary outcome) will be compared between randomised  
5  
6 groups using logistic regression, with adjustment made for age group at  
7  
8 randomisation. The effect of treatment will be described using an odds ratio with a  
9  
10 95% confidence interval.  
11  
12  
13  
14

### 15 **Ethics and dissemination**

16  
17 The protocol and all study materials have been reviewed and approved by the  
18  
19 Women's and Children's Health Network Human Research Ethics Committee  
20  
21 (HREC/20/WCHN/5). Results will be disseminated via peer reviewed publication  
22  
23 and at scientific meetings, professional and public forums.  
24  
25  
26  
27  
28

### 29 **Trial registration number**

30  
31 Australian New Zealand Clinical Trials Registry (ACTRN12621000463875)  
32  
33  
34  
35

### 36 **Strengths and limitations of this study**

- 37  
38
- 39 • A randomised controlled trial will allow a determination of the impact of  
40 Flutext4U intervention.
  - 41 • This trial combines primary care and parent-level interventions and was  
42 designed for delivery in conjunction with a tertiary-level environment.
  - 43 • The primary outcome is an objective measure, influenza vaccination receipt,  
44 which is confirmed on the Australian Immunisation Register.
  - 45 • Standard care and intervention arms are independent but parent interaction  
46 particularly within subspecialties presents an inherent risk of contamination  
47 from intervention arm participants.
  - 48 • To minimise bias at the tertiary provider level and because randomising sub-  
49 specialists would be impractical and risk contamination, both intervention  
50 arms will receive standard care.
- 51  
52  
53  
54  
55  
56  
57  
58  
59  
60

## Introduction

In Australia, influenza is the most common vaccine preventable disease, with direct healthcare costs estimated at >\$115 million per annum.(1, 2) Children and adolescents with special risk medical conditions, as defined in the Australian Immunisation Handbook (hereafter-referred to as SRMC) are a priority group for influenza immunisation, because of their significantly greater risk of influenza-associated hospitalisation and death.(3-5) These conditions include: chronic heart, lung, neurological, metabolic, liver or kidney diseases; cancer; diabetes; Down syndrome and underlying immunosuppression.(6) Around half of all children hospitalised with influenza in Australia have at least one SRMC (1, 7), and these children are 30-70% more likely to be admitted to intensive care, require mechanical ventilation, develop bacterial pneumonia, have prolonged hospitalisation or die following influenza infection.(5)

### Immunisation is the most effective strategy available to prevent influenza and its complications

Individuals at highest risk of influenza-associated complications have been funded under the Australian National Immunisation Program, to receive the vaccine annually since 2010 (6, 8); with the National Seasonal Influenza Vaccination Program generally commencing in the first month of autumn each year. The influenza vaccine in children can reduce the risk of influenza-associated hospitalisation by 65-70%, including children at increased risk.(9, 10) However, uptake is inadequate in children with SRMC, with coverage across Australia collectively across all SRMC only at 40-52%.(11-13)

### Barriers and facilitators to influenza immunisation

Many reasons for low influenza immunisation rates in children with SRMC are



1  
2 modifiable and include: lack of awareness about recommendations, lack of  
3  
4 information, not identifying children as being at risk, concern toward the vaccine/side  
5  
6 effects, inconvenience, lack of perceived influenza severity, misinformation, negative  
7  
8 social influences, need for a priming dose in children 6 months to 9 years, perceived  
9  
10 low efficacy of the vaccine and vaccine access problems.(12, 14-21) Conversely,  
11  
12 children are more likely to receive the influenza vaccine if their parents recall the  
13  
14 child's specialist recommending it, have adequate awareness and knowledge,  
15  
16 believe that the vaccine is effective, safe and easy to access, and if their children  
17  
18 are younger in age (<6 years), have previously had influenza vaccine, have more  
19  
20 than one SRMC, and that their parents or relatives believe it is necessary along with  
21  
22 positive social influences.(11, 13, 15, 18-20, 22, 23)  
23  
24  
25  
26  
27  
28  
29

### 30 Interventions to improve influenza immunisation coverage rates

31  
32 Data informing ways to overcome barriers to vaccine receipt are limited. A  
33  
34 systematic review comprising 25 studies assessing strategies to improve influenza  
35  
36 immunisation in children with SRMC found that interventions targeting practices, and  
37  
38 parent or patients increased coverage by 15% (95%CI: 13-17%) and 57% (52-61%)  
39  
40 respectively.(24) However, most studies were conducted in the United States of  
41  
42 America (USA), focused only on children with asthma and utilised traditional  
43  
44 reminder/recall systems (e.g., written correspondence and telephone calls) that are  
45  
46 financially costly, difficult to track receipt and labour intensive to administer. Text-  
47  
48 message reminders sent by immunisation providers are a low-cost alternative and  
49  
50 have been shown to increase vaccine uptake in some increased-risk groups.(25-28)  
51  
52 Notably no studies have investigated the impact of electronic reminders on influenza  
53  
54 immunisation coverage in children with SRMC.  
55  
56  
57  
58  
59  
60

## Approach to promoting influenza immunisation in children with SRMC

Despite a recommended and funded program targeting children with SRMC, Australia lacks a coordinated implementation-coverage feedback loop, similar to other countries globally.(29, 30) While some hospitals have established services providing immunisation free of charge to children with SRMC, many hospitals and providers recommend that children attend their GP for immunisation, adding to the burden of healthcare visits these families require. Research demonstrates that parents who receive a recommendation from their paediatrician or specialist are up to 16 times more likely to immunise their child.(11, 13) However, less than 58% of parents recall their child's paediatrician recommending influenza immunisation when asked at the end of the season or the following year.(11, 13) Current influenza immunisation protocols often lack consultation with providers and parents and vary significantly, even between departments within the same hospital.(31)

Multi-component interventions are optimal for improving immunisation coverage as they overcome many direct and indirect factors that affect the vaccine decision-making process to address multiple barriers simultaneously. Based in the USA, the Text4Health program implements and evaluates, using randomized control trials, tailored, targeted vaccine text message reminders, with a focus on influenza in urban paediatric and pregnant populations.(27, 28, 32, 33) Other research targeted at the diverse and complex information needs of pregnant women (34, 35) and other special-risk groups (25, 26) demonstrate text-messaging interventions improve coverage. Barriers to influenza immunisation in children with SRMC include: i) a lack of ready access to immunisation services; ii) a lack of healthcare provider recommendation; iii) providers advising against immunisation; iv) safety concerns; v) competing priorities; vi) a lack of understanding of the need to immunise and vii) being unaware of the recommendation to immunise. (11-13, 36) Several barriers

1  
2 also exist at the provider level with a sense of responsibility, knowledge and  
3  
4 confidence of determining 'at risk' conditions, key drivers towards providing a  
5  
6 recommendation.(31)  
7  
8  
9

### 10 Flutext-4U intervention

11  
12 The **Flutext-4U** intervention package includes three components which are centrally  
13  
14 coordinated. At the tertiary-level: prompt/reminder stickers are placed on medical  
15  
16 cases notes and bookmarks at the relevant clinical notes page for notes entry by the  
17  
18 clinician to assist hospital specialists to facilitate vaccine recommendation; at the  
19  
20 primary care-level: a hard copy communication letter is sent to the child's treating  
21  
22 (referring) GP. The written correspondence will advise the GP of the quality  
23  
24 improvement initiative to improve low rates of influenza in children with SRMCs and  
25  
26 ask them to assist as part of the child's treating team to improve influenza vaccine  
27  
28 uptake. The parent-level component includes a text message reminder sent to the  
29  
30 child's parent (on behalf of the hospital) advising them that their child/adolescent is  
31  
32 eligible for funded influenza vaccine and that they can receive it upon request at the  
33  
34 WCH on-site immunisation clinic or at their GP.  
35  
36  
37  
38  
39  
40  
41  
42

## 43 **Methods and analysis**

### 44 Study design

45  
46 This parallel-group randomised controlled trial will measure the impact of the Flutext-  
47  
48 4U intervention on receipt of influenza vaccine in children with SRMC, who are  
49  
50 patients attending specialist appointments at the Women's and Children's Hospital  
51  
52 (WCH), South Australia. Participants will be randomly allocated to one of two  
53  
54 combinations of Flutext-4U components. Participants in study arm 1 (standard care)  
55  
56 will receive the tertiary-level reminder prompts on medical case notes at outpatient  
57  
58 appointments. Study arm 2 will comprise both the primary care and parent-level  
59  
60 components, in addition to standard care (Figure 1).

1  
2  
3  
4 The WCH is one of four public hospitals across metropolitan Adelaide providing care  
5  
6 to children and adolescents aged < 18 years and is the state's leading provider of  
7  
8 specialist care for children with acute and chronic conditions and the largest  
9  
10 maternity and obstetric service. The WCH has 295 beds catering for all paediatric  
11  
12 specialties and its Paediatric Emergency Department is a level 1 major trauma  
13  
14 centre for children in South Australia. Each year, there are more than 30,000  
15  
16 admissions and about 5,000 births at the hospital. In addition, more than 250,000  
17  
18 people come to the hospital as outpatients.  
19  
20  
21  
22  
23

24  
25 The study has been approved by the Women's and Children's Health Network  
26  
27 Human Research Ethics Committee (HREC/20/WCHN/5). The study will be  
28  
29 conducted in accordance with the Declaration of Helsinki and the International  
30  
31 Conference on Harmonization Guidelines on Good Clinical Practice. Below, we  
32  
33 describe the study protocol.  
34  
35  
36  
37  
38

#### 39 Primary objective

- 40 • Determine the difference in proportion of children and adolescents (aged > 6  
41  
42 months to <18 years) in intervention versus standard treatment arm receiving  
43  
44 at least one dose of influenza vaccine by 30/09/2021 (the end of the trial period),  
45  
46 with receipt defined as receipt of one or more doses of influenza vaccine,  
47  
48 confirmed on the Australian Immunisation Register (AIR) record and parental  
49  
50 report.  
51  
52  
53

#### 54 Secondary objectives

- 55 • Determine the difference between intervention and standard treatment arms in  
56  
57 the proportion of children and adolescents receiving at least one dose of  
58  
59 influenza vaccine during the optimal period (April 1 to June 30).  
60

- Determine the difference between intervention and standard treatment arms in the time from randomisation to vaccination.
- Determine whether the impact of the intervention on the primary outcome is modified by the subgroups: i) age group (<5; 5-14, >14 to <18 years); ii) residential location (metro or regional according to the predefined postcodes for metro and regional areas of South Australia) and iii) paediatric subspecialty (diabetes, neurology, respiratory, gastroenterology, rheumatology, cardiology or other).
- Determine parental acceptability of the SMS intervention.

## **Procedures**

### Randomisation

Parents (of children/adolescents) will be randomised to study arm in a 1:1 ratio. The randomisation schedule will be prepared by an independent statistician (not otherwise involved in the conduct or analysis of the trial) and use randomly permuted blocks, stratified by age-group (<5, 5-14, >14 years). The schedule will be provided electronically to the Women's and Children's Health Network (WCHN) ICT Applications System Support staff, who will allocate participants according to the randomisation schedule. The trial statistician will remain blinded.

### Study processes

The Flutext-4U Study Coordinator will set up the system to deliver the specialist prompts (all study participants) and liaise with the WCHN ICT Applications System Support staff to set up text message reminders for parents and communication letters for GPs (trial arm #2) to be sent centrally from the WCH. Influenza vaccine signage will be placed around hospital.

1  
2 Children with SRMC will be identified from the WCH's Outpatient Department's  
3  
4 appointment lists and eligibility screening completed with paediatric specialists on a  
5  
6 fortnightly basis, using criteria set out in the National Immunisation Program for  
7  
8 funded influenza vaccination. A waiver of consent was approved for parents to  
9  
10 participate in this trial. Children will be ineligible if they have already received the  
11  
12 2021 influenza vaccine prior to trial commencement (defined as receipt on AIR); are  
13  
14 a younger sibling of another trial participant (to ensure parents are not randomised  
15  
16 twice); have no listed mobile phone number for parent/ guardian; or have a diagnosis  
17  
18 of Cystic Fibrosis, as these children already receive additional vaccine delivery  
19  
20 support and influenza vaccine messaging within the WCH environment. Participants  
21  
22 (parents) will be randomised to study arm and baseline demographic information will  
23  
24 be collected for all parent-child pairs. Demographic data that may impact vaccine  
25  
26 coverage will be collected and will include the child's age, gender, Aboriginal or  
27  
28 Torres Strait Islander status, medical condition, postcode (to determine SEIFA and  
29  
30 residential location, i.e., metro/regional) and previous influenza vaccine receipt in  
31  
32 2019 and 2020 (from AIR records).  
33  
34  
35  
36  
37  
38  
39  
40

41 Intervention components will be provided, as per study trial arm. Influenza vaccine  
42  
43 reminder stickers and bookmarks will be placed on the hard copy paper medical  
44  
45 case notes of all study participants. As per study arm, a communication (letter) with  
46  
47 the child's treating (referring) GP will advise them that the child is identified as  
48  
49 qualifying for funded influenza vaccine and seeking them to assist as part of the  
50  
51 child's treating team to improve vaccine uptake. Parental SMS text message  
52  
53 reminders will be sent using 'Message Media' software in a non-directive educational  
54  
55 approach automatically to the child's parent advising them that their child/adolescent  
56  
57 is eligible for funded influenza and where they can receive it. These will be timed to  
58  
59 be sent prior to and following scheduled WCH specialist appointments. Each child  
60

1  
2 will receive a maximum of three SMS reminders, for appointments scheduled  
3  
4 between the start of the seasonal influenza vaccination season and the end of July.  
5  
6 Text messages will cease if a parent replies to advise that the child is immunised  
7  
8 and this is confirmed on the AIR. Text messages will comprise: i) the influenza  
9  
10 vaccination message reminder text, ii) an option to reply if the vaccine has been  
11  
12 received elsewhere. Parents will be encouraged to engage with their child's  
13  
14 specialist, GP or immunisation provider to answer any related questions arising from  
15  
16 the influenza vaccination message. Parents may opt-out of further text messages at  
17  
18 any time.  
19  
20  
21  
22  
23  
24

25 At conclusion of the trial, parents in both trial arms will receive an SMS, to ask if the  
26  
27 child had received an influenza vaccine in 2021. All collected identifiable data will be  
28  
29 securely stored on a database held by the WCHN, with access to the database  
30  
31 controlled by password protection. Any data presented will be de-identified prior to  
32  
33 presentation.  
34  
35  
36  
37  
38

### 39 Patient and public involvement

40 Patient and public involvement will include influenza vaccine signage designed in  
41  
42 conjunction with the Flutext-4U Expert Advisory Group and WCH Consumer  
43  
44 Advisory Committee. Parents in both trial arms will receive a parental acceptability  
45  
46 survey. Study results will be communicated to key stakeholders and findings will also  
47  
48 be disseminated in peer reviewed scientific journals and presented at national and  
49  
50 international conferences.  
51  
52  
53  
54  
55

### 56 Study monitoring and surveillance

57 Flutext-4U is a behavioural intervention and as such there are no risks or harms  
58  
59 associated with drugs, procedures or devices in this study. The assessment of  
60  
known potential risks and benefits of the intervention indicate negligible risk through

1 participation in this study. Any risk of psychosocial distress associated with receiving  
2 a vaccine communication (SMS/letter/ reminder) or discussing vaccines is unlikely  
3  
4 and is outweighed by the anticipated benefits to the individual and or knowledge that  
5  
6 might reasonably be expected from the results. The risk of the intervention is  
7  
8 comparable to standard care. A risk assessment and management plan has been  
9  
10 developed for all stages of the trial from trial design through to reporting and  
11  
12 reflective of the nature of the trial as behavioural intervention. A Trial Management  
13  
14 Group comprising the chief investigator, project manager and study coordinator and  
15  
16 statistician will closely review all operational aspects of the conduct and progress of  
17  
18 the trial and a Trial Steering Committee comprising the investigator team and  
19  
20 specialist paediatricians from the study institution, will maintain clinical and ethical  
21  
22 oversight.  
23  
24  
25  
26  
27  
28  
29  
30  
31

### 32 Sample size and analysis plan

33 We plan to enrol at least 540 parents of children / adolescents medically at-risk  
34 receiving tertiary care at the WCH. In order to have 80% power to detect a 30%  
35  
36 relative increase in the percentage of children vaccinated from 40% in the standard  
37  
38 care arm to 52% in the trial arm containing all Flutext-4U components, a sample size  
39  
40 of 270 children per group is required (two-tailed alpha = 0.05). Previous studies have  
41  
42 shown a 30% to 70% relative increase following other immunisation interventions. A  
43  
44 30% relative increase in the percentage vaccinated would be considered clinically  
45  
46 meaningful.  
47  
48  
49  
50  
51  
52  
53

54 All analyses will be undertaken on an intention-to-treat basis according to a statistical  
55  
56 analysis plan, pre-specified prior to database lock. For the primary outcome, the  
57  
58 number and proportion of participants receiving influenza vaccination in each group  
59  
60 will be compared between randomised groups using logistic regression, with



1  
2 adjustment made for age-group (<5, 5-14, >14 years). The effect of treatment will be  
3  
4 described using an odds ratio with a 95% confidence interval. Subgroup analysis will  
5  
6 examine the effect of paediatric subspecialty (diabetes, neurology, respiratory,  
7  
8 gastroenterology, rheumatology, cardiology or other), age group (<5, 5-14, >14 to  
9  
10 <18 years) and residential location (metropolitan, rural according to the predefined  
11  
12 postcodes for metro and regional areas of South Australia) on the primary outcome.  
13  
14 Secondary analyses will be performed using logistic regression for binary outcomes  
15  
16 and a Cox proportional hazards model for time to event outcomes, again with  
17  
18 adjustment for age group (<5, 5-14, >14 to <18 years). In all analyses, a two-sided p-  
19  
20 value < 0.05 will be used to indicate statistical significance. No adjustment will be  
21  
22 made for multiple pre-planned comparisons, as the overall comparison of vaccine  
23  
24 uptake is of primary interest.  
25  
26  
27  
28  
29  
30  
31

## 32 Discussion

33  
34 This study will assess the effectiveness of a structured multimodal strategy using  
35  
36 evidence-based tools and targeting a paediatric hospital and parents of children with  
37  
38 SRMC to increase child influenza immunisation coverage rates. The intervention  
39  
40 combines primary care-level and parent-level interventions and was designed for  
41  
42 delivery in conjunction with a tertiary-level environment.  
43  
44  
45

46  
47 Improving immunisation coverage in high-risk populations remains at the forefront of  
48  
49 implementation research. Yet, investment into programs and research to ensure  
50  
51 funded vaccines are administered to those who need them most has been limited.  
52  
53 Only 43.9% (WCH) children with SRMC received influenza vaccine in 2015, despite  
54  
55 a funded influenza program for this at-risk group.(11)  
56  
57

58  
59 Many modifiable barriers to annual influenza immunisation exist and multimodal  
60  
strategies using: i) practice-level or ii) patient (or parent)-level interventions have

1  
2 been shown to improve immunisation rates. Employing extensive pilot data obtained  
3  
4 by our research from parents and healthcare workers we are uniquely placed to  
5  
6 develop, implement and evaluate Flutext-4U. Flutext-4U is a structured multimodal  
7  
8 strategy using evidence-based tools and targeting paediatric hospitals and parents of  
9  
10 children with SRMC to increase child influenza immunisation coverage rates. Flutext-  
11  
12 4U will be implemented at the WCH using a randomised controlled trial design  
13  
14 followed by thorough evaluation.  
15  
16  
17  
18

19 We are mindful of the inherent risk from contamination from intervention arm  
20  
21 participants, particularly within medical risk groups due to parent interaction. To  
22  
23 minimise bias at the tertiary provider level and because randomising sub-specialists  
24  
25 would be impractical, with an almost certain chance of cross-contamination, both  
26  
27 intervention arms will receive standard care.  
28  
29  
30  
31  
32

33 It is also important to collect data on parental acceptability of the intervention as this  
34  
35 will have the potential to inform any adaptations to the future implementation of the  
36  
37 intervention. Flutext-4U will develop coordinated approaches to immunising children  
38  
39 with SRMC and establish the evidence required to optimise paediatric influenza  
40  
41 immunisation strategies and campaigns. It will provide a model for future targeted  
42  
43 high-risk programs nationally.  
44  
45  
46  
47  
48

49 If the study demonstrates no negative effects, the intervention will be subsequently  
50  
51 implemented for all children with SRMC at the WCH. Any impact on coverage will  
52  
53 assist other Australian jurisdictions and national program directors in the  
54  
55 implementation of similar programs. Additionally, a focus on developing low-cost,  
56  
57 adaptable and scalable methods for improving coverage rates is expected to have  
58  
59 implications for many at-risk populations so that the intervention could be adapted  
60  
and tested in other populations.

## Authors' contributions

JT wrote the first draft with assistance from KH, TRS and HM. JF, JC, NS, AT, AK, RC, MF, LF, MD and CB contributed to the manuscript and all authors approved the final version for publication.

## Competing interests statement.

JT is an investigator on a project grant sponsored by Industry. Her institution has received funding from Industry (GSK) for investigator led research. She does not receive any personal payments from Industry. HM is an investigator on clinical vaccine trials sponsored by Industry (Pfizer, GSK). Her institution receives funding for Investigator led research from GSK, Pfizer, Sanofi-Pasteur. All other authors (KH, TS, JF, JC, NS, AT, AK, RC, MF, LF, MD, CB) report no conflicts of interest.

## Funding statement

This work is supported by a Women's and Children's Hospital Foundation Grant.

## Figure 1: Study design

Footnote: SRMC: special risk medical condition.

## References

1. Blyth CC, Macartney, K.K., McRae, J., Clark, J., Marshall, H.S., Buttery, J., Francis, J.R., Kotsimpos, T., Kelly, P.M., Allen, A.C. Influenza epidemiology, vaccine coverage and vaccine effectiveness in children admitted to sentinel Australian hospitals in 2017: Results from the PAEDS-FluCAN Collaboration. TO BE UPDATED. 2018.
2. Newall AT, Scuffham PA. Influenza-related disease: the cost to the Australian healthcare system. *Vaccine*. 2008;26(52):6818-23.
3. World Health Organisation. Vaccines against influenza WHO position paper - November 2012. *Wkly Epidemiol Rec*. 2012;87(47):461-76.
4. Gill PJ, Ashdown HF, Wang K, et al. Identification of children at risk of influenza-related complications in primary and ambulatory care: a systematic review and meta-analysis. *The Lancet Respiratory medicine*. 2015;3(2):139-49.
5. Tuckerman J, Misan S, Crawford NW, et al. Influenza in Children with Special Risk Medical Conditions: A Systematic Review and Meta-Analysis. *PIDJ*. 2019.
6. Australian Technical Advisory Group on Immunisation (ATAGI). The Australian Immunisation Handbook [Electronic book]. Canberra: Australian Government Department of Health; 2018 [Available from: <https://immunisationhandbook.health.gov.au/>].
7. Lakhani N, Clarke M, Mathew SM, et al. Retrospective review of factors associated with severe hospitalised community-acquired influenza in a tertiary paediatric hospital in South Australia. *Influenza and other respiratory viruses*. 2016;10(6):479-85.
8. Australian Technical Advisory Group on Immunisation (ATAGI). Statement on the Administration of Seasonal Influenza Vaccines in 2019. Canberra: Australian Government Department of Health; 5 April 2019 [Available from: <https://beta.health.gov.au/file/10519/download?token=1zBZrm6E>].
9. Blyth CC, Jacoby P, Effler PV, et al. Effectiveness of trivalent flu vaccine in healthy young children. *Pediatrics*. 2014;133(5):e1218-25.
10. Blyth CC, Jacoby P, Effler PV, et al. Influenza Vaccine Effectiveness and Uptake in Children at Risk of Severe Disease. *The Pediatric infectious disease journal*. 2016;35(3):309-15.
11. Tuckerman J, Misan S, Salih S, et al. Influenza vaccination: Uptake and associations in a cross-sectional study of children with special risk medical conditions. *Vaccine*. 2018;36(52):8138-47.
12. Newcombe J, Kaur R, Wood N, et al. Prevalence and determinants of influenza vaccine coverage at tertiary paediatric hospitals. *Vaccine*. 2014;32(48):6364-8.
13. Norman DA, Danchin M, Van Buynder P, et al. Caregiver's attitudes, beliefs, and experiences for influenza vaccination in Australian children with medical comorbidities. *Vaccine*. 2019;37(16):2244-8.
14. Pandolfi E, Marino MG, Carloni E, et al. The effect of physician's recommendation on seasonal influenza immunization in children with chronic diseases. *BMC Public Health*. 2012;12:984.(doi):10.1186/471-2458-12-984.
15. Esposito S, Marchisio P, Droghetti R, et al. Influenza vaccination coverage among children with high-risk medical conditions. *Vaccine*. 2006;24(24):5251-5. Epub 2006 Mar 31.
16. Daley MF, Beaty BL, Barrow J, et al. Missed opportunities for influenza vaccination in children with chronic medical conditions. *Archives of pediatrics & adolescent medicine*. 2005;159(10):986-91.
17. Romano M, Pandolfi E, Marino MG, et al. Seasonal and pandemic influenza vaccine: recommendations to families of at-risk children during the 2009-10 season. *Eur J Public Health*. 2012;22(6):821-4. doi: 10.1093/eurpub/cks005. Epub 2012 Feb 7.
18. Gnanasekaran SK, Finkelstein JA, Hohman K, et al. Parental perspectives on influenza vaccination among children with asthma. *Public health reports*. 2006;121(2):181-8.
19. Lin CJ, Zimmerman RK, Nowalk MP, et al. Parental perspectives on influenza vaccination of children with chronic medical conditions. *Journal of the National Medical Association*. 2006;98(2):148-53.
20. Peleg N, Zevit N, Shamir R, et al. Seasonal influenza vaccination rates and reasons for non-vaccination in children with gastrointestinal disorders. *Vaccine*. 2015;33(1):182-6.
21. Principi N, Esposito S. Pediatric influenza prevention and control. *Emerging infectious diseases*. 2004;10(4):574-80.

22. Lin CJ, Nowalk MP, Zimmerman RK, et al. Beliefs and attitudes about influenza immunization among parents of children with chronic medical conditions over a two-year period. *Journal of urban health : bulletin of the New York Academy of Medicine*. 2006;83(5):874-83.
23. Rodriguez-Rieiro C, Dominguez-Berjon MF, Esteban-Vasallo MD, et al. Vaccination coverage against 2009 seasonal influenza in chronically ill children and adults: analysis of population registries in primary care in Madrid (Spain). *Vaccine*. 2010;28(38):6203-9.
24. Norman DA, Barnes R, Pavlos R, et al. Improving Influenza Vaccination in Children With Comorbidities: A Systematic Review. *Pediatrics*. 2021;147(3).
25. Stephens A, Wynn C, Stockwell M. Understanding the Use of Digital Technology to Promote Human Papillomavirus Vaccination- A RE-AIM Framework Approach. *Human vaccines & immunotherapeutics*. 2019.
26. Regan AK, Bloomfield L, Peters I, et al. Randomized Controlled Trial of Text Message Reminders for Increasing Influenza Vaccination. *Annals of family medicine*. 2017;15(6):507-14.
27. Stockwell MS, Kharbanda EO, Martinez RA, et al. Effect of a text messaging intervention on influenza vaccination in an urban, low-income pediatric and adolescent population: a randomized controlled trial. *JAMA : the journal of the American Medical Association*. 2012;307(16):1702-8.
28. Stockwell MS, Hofstetter AM, DuRivage N, et al. Text message reminders for second dose of influenza vaccine: a randomized controlled trial. *Pediatrics*. 2015;135(1):e83-91.
29. European Centre for Disease Prevention and Control. Seasonal influenza vaccination in Europe. Vaccination recommendations and coverage rates in the EU Member States for eight influenza seasons: 2007–2008 to 2014–2015. Stockholm: ECDC; 2017.
30. European Centre for Disease Prevention and Control. Seasonal influenza vaccination in Europe - Overview of vaccination recommendations and coverage rates in the EU Member States for the 2012-13 influenza season. . Stockholm: ECDC; 2015.
31. Tuckerman J, Crawford NW, Marshall HS. Seasonal influenza vaccination for children with special risk medical conditions: does policy meet practice? *J Paediatr Child Health*. 2020;56(9):1388-95.
32. Stockwell MS, Kharbanda EO, Martinez RA, et al. Text4Health: impact of text message reminder-recalls for pediatric and adolescent immunizations. *American journal of public health*. 2012;102(2):e15-21.
33. Hofstetter AM, Vargas CY, Kennedy A, et al. Parental and provider preferences and concerns regarding text message reminder/recall for early childhood vaccinations. *Preventive medicine*. 2013;57(2):75-80.
34. Chamberlain AT, Seib K, Ault KA, et al. Improving influenza and Tdap vaccination during pregnancy: A cluster-randomized trial of a multi-component antenatal vaccine promotion package in late influenza season. *Vaccine*. 2015;33(30):3571-9.
35. Kaufman J, Attwell K, Tuckerman J, et al. Feasibility and acceptability of the multi-component P3-MumBubVax antenatal intervention to promote maternal and childhood vaccination: A pilot study. *Vaccine*. 2020;38(24):4024-31.
36. Newcombe J, Kaur R, Wood N, et al. Paediatrician beliefs and practices around influenza vaccination. *Journal of paediatrics and child health*. 2017;53(7):711-4.

## Acknowledgments

We acknowledge the assistance of the WCHN ICT Applications System Support,

Corporate Administration Services: Jillian Edwards and Nicola Barzen; Medical

Records Department: Denica Tohill and Immunisation Clinic: Breda MacDonald and

Elisabeth Lay and members of the WCH Consumer Advisory Committee.

CCB is supported by a NHMRC emerging leadership fellowship APP1173163. TRS

is supported by a NHMRC emerging leadership fellowship APP1173576.

For peer review only

1  
2  
3  
4  
5  
6  
7  
8  
9  
10  
11  
12  
13  
14  
15  
16  
17  
18  
19  
20  
21  
22  
23  
24  
25  
26  
27  
28  
29  
30  
31  
32  
33  
34  
35  
36  
37  
38  
39  
40  
41  
42  
43  
44  
45  
46  
47  
48  
49  
50  
51  
52  
53  
54  
55  
56  
57  
58  
59  
60

For peer review only

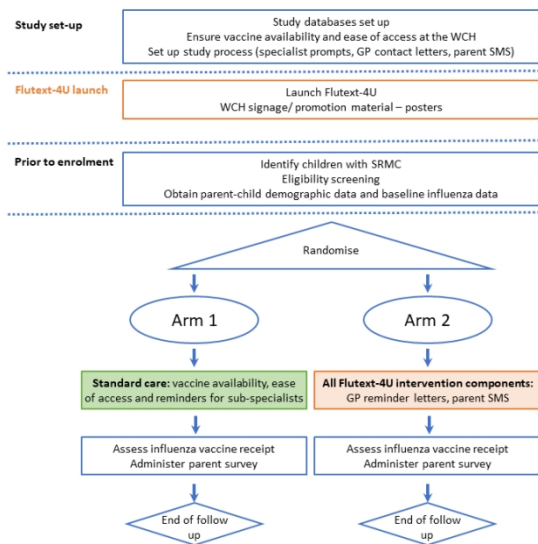

Figure 1: Study design

338x190mm (96 x 96 DPI)



# BMJ Open

## Utilising provider-parent strategies to improve influenza vaccination in children and adolescents with special risk medical conditions: a randomised controlled trial protocol

|                                 |                                                                                                                                                                                                                                                                                                                                                                                                                                                                                                                                                                                                                                                                                                                                                                                                                                                                                                                                                                                                                                                                                                                                                                                                                                                                                                                                                                                                                                                                                                                                                                                                                                                                                                                                                                                                                                                                                                               |
|---------------------------------|---------------------------------------------------------------------------------------------------------------------------------------------------------------------------------------------------------------------------------------------------------------------------------------------------------------------------------------------------------------------------------------------------------------------------------------------------------------------------------------------------------------------------------------------------------------------------------------------------------------------------------------------------------------------------------------------------------------------------------------------------------------------------------------------------------------------------------------------------------------------------------------------------------------------------------------------------------------------------------------------------------------------------------------------------------------------------------------------------------------------------------------------------------------------------------------------------------------------------------------------------------------------------------------------------------------------------------------------------------------------------------------------------------------------------------------------------------------------------------------------------------------------------------------------------------------------------------------------------------------------------------------------------------------------------------------------------------------------------------------------------------------------------------------------------------------------------------------------------------------------------------------------------------------|
| Journal:                        | <i>BMJ Open</i>                                                                                                                                                                                                                                                                                                                                                                                                                                                                                                                                                                                                                                                                                                                                                                                                                                                                                                                                                                                                                                                                                                                                                                                                                                                                                                                                                                                                                                                                                                                                                                                                                                                                                                                                                                                                                                                                                               |
| Manuscript ID                   | bmjopen-2021-053838.R1                                                                                                                                                                                                                                                                                                                                                                                                                                                                                                                                                                                                                                                                                                                                                                                                                                                                                                                                                                                                                                                                                                                                                                                                                                                                                                                                                                                                                                                                                                                                                                                                                                                                                                                                                                                                                                                                                        |
| Article Type:                   | Protocol                                                                                                                                                                                                                                                                                                                                                                                                                                                                                                                                                                                                                                                                                                                                                                                                                                                                                                                                                                                                                                                                                                                                                                                                                                                                                                                                                                                                                                                                                                                                                                                                                                                                                                                                                                                                                                                                                                      |
| Date Submitted by the Author:   | 09-Dec-2021                                                                                                                                                                                                                                                                                                                                                                                                                                                                                                                                                                                                                                                                                                                                                                                                                                                                                                                                                                                                                                                                                                                                                                                                                                                                                                                                                                                                                                                                                                                                                                                                                                                                                                                                                                                                                                                                                                   |
| Complete List of Authors:       | <p>TUCKERMAN, Jane; The University of Adelaide Adelaide Medical School, Adelaide Medical School; Murdoch Children's Research Institute and Faculty of Medicine, Dentistry and Health Sciences, University of Melbourne</p> <p>Harper, Kelly ; Women's and Children's Health Network; The University of Adelaide, Robinson Research Institute</p> <p>Sullivan, Thomas; South Australian Health and Medical Research Institute; University of Adelaide, School of Public Health</p> <p>Fereday, Jenny; Women's and Children's Health Network</p> <p>Couper, Jennifer; The University of Adelaide, Robinson Research Institute</p> <p>Smith, Nicholas; University of Adelaide, Adelaide Medical School; Women's and Children's Health Network</p> <p>Tai, Andrew; Women's and Children's Health Network; The University of Adelaide, Robinson Research Institute</p> <p>Kelly, Andrew; University of Adelaide, Adelaide Medical School; Women's and Children's Health Network</p> <p>Couper, Richard; Women's and Children's Health Network</p> <p>Friswell, Mark; Women's and Children's Health Network</p> <p>Flood, Louise; South Australian Department of Health and Wellbeing, Communicable Disease Control Branch</p> <p>Danchin, Margaret; Murdoch Children's Research Institute and Faculty of Medicine, Dentistry and Health Sciences, University of Melbourne ; The Royal Children's Hospital Melbourne, Department of General Medicine</p> <p>Blyth, Christopher C.; Univ Western Australia, Wesfarmers Centre of Vaccines and Infectious Diseases, Telethon Kids Institute and School of Medicine; Department of Infectious Diseases, Perth Children's Hospital and Department of Microbiology, PathWest Laboratory Medicine, QEII medical centre</p> <p>Marshall, Helen; University of Adelaide, Robinson Research Institute and Adelaide Medical School; Women's and Children's Health Network</p> |
| <b>Primary Subject Heading</b>: | Infectious diseases                                                                                                                                                                                                                                                                                                                                                                                                                                                                                                                                                                                                                                                                                                                                                                                                                                                                                                                                                                                                                                                                                                                                                                                                                                                                                                                                                                                                                                                                                                                                                                                                                                                                                                                                                                                                                                                                                           |
| Secondary Subject Heading:      | Paediatrics, Public health, Research methods                                                                                                                                                                                                                                                                                                                                                                                                                                                                                                                                                                                                                                                                                                                                                                                                                                                                                                                                                                                                                                                                                                                                                                                                                                                                                                                                                                                                                                                                                                                                                                                                                                                                                                                                                                                                                                                                  |
| Keywords:                       | Paediatric infectious disease & immunisation < PAEDIATRICS, Public health < INFECTIOUS DISEASES, Protocols & guidelines < HEALTH SERVICES ADMINISTRATION & MANAGEMENT, PREVENTIVE MEDICINE                                                                                                                                                                                                                                                                                                                                                                                                                                                                                                                                                                                                                                                                                                                                                                                                                                                                                                                                                                                                                                                                                                                                                                                                                                                                                                                                                                                                                                                                                                                                                                                                                                                                                                                    |

1  
2  
3  
4  
5  
6  
7  
8  
9  
10  
11  
12  
13  
14  
15  
16  
17  
18  
19  
20  
21  
22  
23  
24  
25  
26  
27  
28  
29  
30  
31  
32  
33  
34  
35  
36  
37  
38  
39  
40  
41  
42  
43  
44  
45  
46  
47  
48  
49  
50  
51  
52  
53  
54  
55  
56  
57  
58  
59  
60

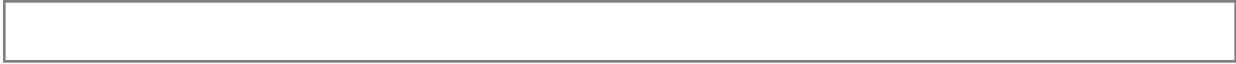

SCHOLARONE™  
Manuscripts

1  
2  
3  
4  
5  
6  
7  
8  
9  
10  
11  
12  
13  
14  
15  
16  
17  
18  
19  
20  
21  
22

## Utilising provider-parent strategies to improve influenza vaccination in children and adolescents with special risk medical conditions: a randomised controlled trial protocol

### Authors

Jane Tuckerman<sup>1,2,3</sup>, Kelly Harper<sup>4,5</sup>, Thomas Sullivan<sup>6,7</sup>, Jenny Fereday<sup>4</sup>, Jennifer Couper<sup>5</sup>, Nicholas Smith<sup>1,4</sup>, Andrew Tai<sup>4,5</sup>, Andrew Kelly<sup>1,4</sup>, Richard Couper<sup>4</sup>, Mark Friswell<sup>4</sup>, Louise Flood<sup>8</sup>, Margaret Danchin<sup>2,3,9</sup>, Christopher C Blyth<sup>10,11,12</sup>, Helen Marshall<sup>1,4,5</sup>

### Affiliations

1. Adelaide Medical School, University of Adelaide, South Australia, Australia
2. Murdoch Children's Research Institute, Melbourne, Australia
3. University of Melbourne, Melbourne, Australia
4. Women's and Children's Health Network, North Adelaide, Australia
5. Robinson Research Institute, University of Adelaide, South Australia, Australia
6. SAHMRI Women & Kids, South Australian Health & Medical Research Institute, South Australia, Australia.
7. School of Public Health, University of Adelaide, South Australia, Australia.
8. Communicable Disease Control Branch, South Australian Department of Health and Wellbeing, Adelaide, Australia
9. Department of General Medicine, The Royal Children's Hospital, Melbourne
10. Wesfarmers Centre of Vaccines and Infectious Diseases, Telethon Kids Institute and School of Medicine, University of Western Australia
11. Department of Infectious Diseases, Perth Children's Hospital, Perth, Western Australia
12. Department of Microbiology, PathWest Laboratory Medicine, QEII medical centre

1  
2 Corresponding author

3  
4 Dr Jane Tuckerman

5  
6 Murdoch Children's Research Institute

7  
8 Royal Children's Hospital,

9  
10 50 Flemington Road,

11  
12 Parkville 3052

13  
14 AUSTRALIA

15  
16 Email: jane.tuckerman@mcri.edu.au

17  
18  
19  
20  
21  
22  
23  
24  
25  
26  
27  
28  
29  
30  
31  
32  
33  
34  
35  
36  
37  
38  
39  
40  
41  
42  
43  
44  
45  
46  
47  
48  
49  
50  
51  
52  
53  
54  
55  
56  
57  
58  
59  
60

For peer review only

## Abstract

### Introduction

Influenza immunisation is a highly cost-effective public health intervention. Despite a comprehensive National Immunisation Program, influenza vaccination in children and adolescents with special risk medical conditions (SRMC) is suboptimal. Flutext-4U is an innovative, multi-component strategy targeting paediatric hospitals, general practice, and parents of children and adolescents with SRMC. The Flutext-4U study aims to assess the impact of Flutext-4U to increase influenza immunisation in children and adolescents with SRMC.

### Methods and analysis

This is a randomised controlled trial involving parents of children and adolescents (aged >6 months to <18 years) with SRMC receiving tertiary care at the Women's and Children's Hospital (WCH), Adelaide, South Australia, who are eligible for funded influenza immunisation with a hospital appointment between the start of the seasonal influenza vaccination season and 31 July 2021, their treating general practitioners (GP), and WCH paediatric specialists.

Parents (of children/adolescents with SRMC) are randomised (1:1 ratio) to standard care plus intervention (SMS reminder messages to parents; reminders (written correspondence) for their child's GP from the hospital's Paediatric Outpatients Department) or standard care (hospital vaccine availability, ease of access and reminders for WCH sub-specialists) with randomisation stratified by age-group (<5, 5-14, >14 to <18 years).

1  
2 The primary outcome is influenza vaccination, as confirmed by the Australian  
3  
4 Immunisation Register (AIR).  
5  
6  
7

8  
9 The proportion vaccinated (primary outcome) will be compared between randomised  
10  
11 groups using logistic regression, with adjustment made for age group at  
12  
13 randomisation. The effect of treatment will be described using an odds ratio with a  
14  
15 95% confidence interval.  
16  
17

### 18 19 20 **Ethics and dissemination**

21  
22 The protocol and all study materials have been reviewed and approved by the  
23  
24 Women's and Children's Health Network Human Research Ethics Committee  
25  
26 (HREC/20/WCHN/5). Results will be disseminated via peer reviewed publication  
27  
28 and at scientific meetings, professional and public forums.  
29  
30  
31

### 32 33 34 **Trial registration number**

35  
36 Australian New Zealand Clinical Trials Registry (ACTRN12621000463875).  
37  
38

### 39 40 **Strengths and limitations of this study**

- 41 • A randomised controlled trial will allow a determination of the impact of  
42 Flutext4U intervention.
- 43 • This trial combines primary care and parent-level interventions and was  
44 designed for delivery in conjunction with a tertiary-level environment.
- 45 • The primary outcome is an objective measure, influenza vaccination receipt,  
46 which is confirmed on the Australian Immunisation Register.
- 47 • Standard care and intervention arms are independent but parent interaction  
48 particularly within subspecialties presents an inherent risk of contamination  
49 from intervention arm participants.
- 50 • To minimise bias at the tertiary provider level and because randomising sub-  
51 specialists would be impractical and risk contamination, both arms will receive  
52 standard care.
- 53  
54  
55  
56  
57  
58  
59  
60

1  
2  
3  
4  
5  
6  
7  
8  
9  
10  
11  
12  
13  
14  
15  
16  
17  
18  
19  
20  
21  
22  
23  
24  
25  
26  
27  
28  
29  
30  
31  
32  
33  
34  
35  
36  
37  
38  
39  
40  
41  
42  
43  
44  
45  
46  
47  
48  
49  
50  
51  
52  
53  
54  
55  
56  
57  
58  
59  
60

For peer review only

## Introduction

In Australia, influenza is the most common vaccine preventable disease, with direct healthcare costs estimated at >\$115 million per annum.(1, 2) Children and adolescents with special risk medical conditions, as defined in the Australian Immunisation Handbook (hereafter-referred to as SRMC) are a priority group for influenza immunisation, because of their significantly greater risk of influenza-associated hospitalisation and death.(3-5) These conditions include: chronic heart, lung, neurological, metabolic, liver or kidney diseases; cancer; diabetes; Down syndrome and underlying immunosuppression.(6) Around half of all children hospitalised with influenza in Australia have at least one SRMC (1, 7), and these children are 30-70% more likely to be admitted to intensive care, require mechanical ventilation, develop bacterial pneumonia, have prolonged hospitalisation or die following influenza infection.(5)

### Immunisation is the most effective strategy available to prevent influenza and its complications

Individuals at highest risk of influenza-associated complications have been funded under the Australian National Immunisation Program, to receive the vaccine annually since 2010 (6, 8); with the National Seasonal Influenza Vaccination Program generally commencing in the first month of autumn each year. The influenza vaccine in children can reduce the risk of influenza-associated hospitalisation by 65-70%, including children at increased risk.(9, 10) However, uptake is inadequate in children with SRMC, with coverage across Australia collectively across all SRMC only at 40-52%.(11-13)



## Barriers and facilitators to influenza immunisation

Many reasons for low influenza immunisation rates in children with SRMC are modifiable and include: lack of awareness about recommendations, lack of information, not identifying children as being at risk, concern toward the vaccine/side effects, inconvenience, lack of perceived influenza severity, misinformation, negative social influences, need for a priming dose in children 6 months to 9 years, perceived low efficacy of the vaccine and vaccine access problems.(12, 14-21) Conversely, children are more likely to receive the influenza vaccine if their parents recall the child's specialist recommending it, have adequate awareness and knowledge, believe that the vaccine is effective, safe and easy to access, and if their children are younger in age (<6 years), have previously had influenza vaccine, have more than one SRMC, and that their parents or relatives believe it is necessary along with positive social influences.(11, 13, 15, 18-20, 22, 23)

## Interventions to improve influenza immunisation coverage rates

Data informing ways to overcome barriers to vaccine receipt are limited. A systematic review comprising 25 studies assessing strategies to improve influenza immunisation in children with SRMC found that interventions targeting practices, and parent or patients increased coverage by 15% (95%CI: 13-17%) and 57% (52-61%) respectively.(24) However, most studies were conducted in the United States of America (USA), focused only on children with asthma and utilised traditional reminder/recall systems (e.g., written correspondence and telephone calls) that are financially costly, difficult to track receipt and labour intensive to administer. Text-message reminders sent by immunisation providers are a low-cost alternative and have been shown to increase vaccine uptake in some increased-risk groups.(25-28)

1  
2 Notably no studies have investigated the impact of electronic reminders on influenza  
3  
4 immunisation coverage in children with SRMC.  
5  
6  
7

### 8 9 Approach to promoting influenza immunisation in children with SRMC

10  
11 Despite a recommended and funded program targeting children with SRMC,  
12  
13 Australia lacks a coordinated implementation-coverage feedback loop, similar to  
14  
15 other countries globally.(29, 30) While some hospitals have established services  
16  
17 providing immunisation free of charge to children with SRMC, many hospitals and  
18  
19 providers recommend that children attend their GP for immunisation, adding to the  
20  
21 burden of healthcare visits these families require. Research demonstrates that  
22  
23 parents who receive a recommendation from their paediatrician or specialist are up  
24  
25 to 16 times more likely to immunise their child.(11, 13) However, less than 58% of  
26  
27 parents recall their child's paediatrician recommending influenza immunisation when  
28  
29 asked at the end of the season or the following year.(11, 13) Current influenza  
30  
31 immunisation protocols often lack consultation with providers and parents and vary  
32  
33 significantly, even between departments within the same hospital.(31)  
34  
35  
36  
37  
38  
39  
40

41 Multi-component interventions are optimal for improving immunisation coverage as  
42  
43 they overcome many direct and indirect factors that affect the vaccine decision-  
44  
45 making process to address multiple barriers simultaneously. Based in the USA, the  
46  
47 Text4Health program implements and evaluates, using randomized control trials,  
48  
49 tailored, targeted vaccine text message reminders, with a focus on influenza in urban  
50  
51 paediatric and pregnant populations.(27, 28, 32, 33) Other research targeted at the  
52  
53 diverse and complex information needs of pregnant women (34, 35) and other  
54  
55 special-risk groups (25, 26) demonstrate text-messaging interventions improve  
56  
57 coverage. Barriers to influenza immunisation in children with SRMC include: i) a lack  
58  
59  
60

1  
2 of ready access to immunisation services; ii) a lack of healthcare provider  
3  
4 recommendation; iii) providers advising against immunisation; iv) safety concerns; v)  
5  
6 competing priorities; vi) a lack of understanding of the need to immunise and vii)  
7  
8 being unaware of the recommendation to immunise. (11-13, 36) Several barriers  
9  
10 also exist at the provider level with a sense of responsibility, knowledge and  
11  
12 confidence of determining 'at risk' conditions, key drivers towards providing a  
13  
14 recommendation.(31)  
15  
16  
17  
18  
19

### 20 Flutext-4U intervention

21  
22 The **Flutext-4U** intervention package includes three components which are centrally  
23  
24 coordinated. At the tertiary-level: prompt/reminder stickers are placed on medical  
25  
26 cases notes and bookmarks at the relevant clinical notes page for notes entry by the  
27  
28 clinician to assist hospital specialists to facilitate vaccine recommendation; at the  
29  
30 primary care-level: a hard copy communication letter is sent to the child's treating  
31  
32 (referring) GP. The written correspondence will advise the GP of the quality  
33  
34 improvement initiative to improve low rates of influenza in children with SRMCs and  
35  
36 ask them to assist as part of the child's treating team to improve influenza vaccine  
37  
38 uptake. The parent-level component includes a text message reminder sent to the  
39  
40 child's parent (on behalf of the hospital) advising them that their child/adolescent is  
41  
42 eligible for funded influenza vaccine and that they can receive it upon request at the  
43  
44 WCH on-site immunisation clinic or at their GP.  
45  
46  
47  
48  
49  
50

## 51 **Methods and analysis**

### 52 Study design

53  
54 This parallel-group randomised controlled trial will measure the impact of the Flutext-  
55  
56 4U intervention on receipt of influenza vaccine in children with SRMC, who are  
57  
58 patients attending specialist appointments at the Women's and Children's Hospital  
59  
60

1  
2 (WCH), South Australia. Participants will be randomly allocated to one of two  
3  
4 combinations of Flutext-4U components. Participants in study arm 1 (standard care)  
5  
6 will receive the tertiary-level reminder prompts on medical case notes at outpatient  
7  
8 appointments. Study arm 2 will comprise both the primary care and parent-level  
9  
10 components, in addition to standard care (Figure 1).  
11  
12  
13  
14

15  
16 The WCH is one of four public hospitals across metropolitan Adelaide providing care  
17  
18 to children and adolescents aged < 18 years and is the state's leading provider of  
19  
20 specialist care for children with acute and chronic conditions and the largest  
21  
22 maternity and obstetric service. The WCH has 295 beds catering for all paediatric  
23  
24 specialties and its Paediatric Emergency Department is a level 1 major trauma  
25  
26 centre for children in South Australia. Each year, there are more than 30,000  
27  
28 admissions and about 5,000 births at the hospital. In addition, more than 250,000  
29  
30 people come to the hospital as outpatients.  
31  
32  
33  
34  
35

36  
37 The study has been approved by the Women's and Children's Health Network  
38  
39 Human Research Ethics Committee (HREC/20/WCHN/5). The study will be  
40  
41 conducted in accordance with the Declaration of Helsinki and the International  
42  
43 Conference on Harmonization Guidelines on Good Clinical Practice. Below, we  
44  
45 describe the study protocol.  
46  
47  
48  
49

#### 50 Primary objective

- 51 • Determine the difference in proportion of children and adolescents (aged > 6  
52 months to <18 years) in intervention versus standard treatment arm receiving  
53 at least one dose of influenza vaccine by 30/09/2021 (the end of the trial period),  
54 with receipt defined as receipt of one or more doses of influenza vaccine,  
55  
56  
57  
58  
59  
60

1 confirmed on the Australian Immunisation Register (AIR) record (primary  
2 outcome) and parental report.  
3  
4  
5

### 6 Secondary objectives 7

- 8 • Determine the difference between intervention and standard treatment arms in  
9 the proportion of children and adolescents receiving at least one dose of  
10 influenza vaccine during the optimal period (April 1 to June 30).  
11  
12
- 13 • Determine the difference between intervention and standard treatment arms in  
14 the time from randomisation to vaccination.  
15  
16
- 17 • Determine whether the impact of the intervention on the primary outcome is  
18 modified by the subgroups: i) age group (<5; 5-14, >14 to <18 years); ii)  
19 residential location (metro or regional according to the predefined postcodes  
20 for metro and regional areas of South Australia) and iii) paediatric subspecialty  
21 (diabetes, neurology, respiratory, gastroenterology, rheumatology, cardiology  
22 or other).  
23  
24
- 25 • Determine parental acceptability of the SMS intervention.  
26  
27  
28  
29  
30  
31  
32  
33  
34  
35  
36  
37

### 38 **Procedures**

#### 39 Randomisation

40 Parents (of children/adolescents) will be randomised to study arm in a 1:1 ratio. The  
41 randomisation schedule will be prepared by an independent statistician (not  
42 otherwise involved in the conduct or analysis of the trial) using ralloc.ado version  
43 3.7.6 in Stata version 16. Allocations will be performed using randomly permuted  
44 blocks, stratified by age-group (<5, 5-14, >14 to <18 years). The schedule will be  
45 provided electronically to the Women's and Children's Health Network (WCHN) ICT  
46 Applications System Support staff, who will allocate participants according to the  
47 randomisation schedule. The trial statistician will remain blinded.  
48  
49  
50  
51  
52  
53  
54  
55  
56  
57  
58  
59  
60

## Study processes

The Flutext-4U Study Coordinator will set up the system to deliver the specialist prompts (all study participants) and liaise with the WCHN ICT Applications System Support staff to set up text message reminders for parents and communication letters for GPs (trial arm #2) to be sent centrally from the WCH. Influenza vaccine signage will be placed around hospital.

Children with SRMC will be identified from the WCH's Outpatient Department's appointment lists and eligibility screening completed with paediatric specialists on a fortnightly basis, using criteria set out in the National Immunisation Program for funded influenza vaccination. A waiver of consent was approved for parents to participate in this trial. Children will be ineligible if they have already received the 2021 influenza vaccine prior to trial commencement (defined as receipt on AIR); are a younger sibling of another trial participant (to ensure parents are not randomised twice); have no listed mobile phone number for parent/ guardian; or have a diagnosis of Cystic Fibrosis, as these children already receive additional vaccine delivery support and influenza vaccine messaging within the WCH environment. Participants (parents) will be randomised to study arm and baseline demographic information will be collected for all parent-child pairs. Demographic data that may impact vaccine coverage will be collected and will include the child's age, gender, Aboriginal or Torres Strait Islander status, medical condition, postcode (to determine SEIFA and residential location, i.e., metro/regional) and previous influenza vaccine receipt in 2019 and 2020 (from AIR records).

Intervention components will be provided, as per study trial arm. Influenza vaccine reminder stickers and bookmarks will be placed on the hard copy paper medical

1  
2 case notes of all study participants, this will occur once eligibility and enrolment are  
3  
4 confirmed and will be up to two weeks but no less than one week prior to the  
5  
6 appointment. As per study arm, a communication (letter) with the child's treating  
7  
8 (referring) GP will advise them that the child is identified as qualifying for funded  
9  
10 influenza vaccine and seeking them to assist as part of the child's treating team to  
11  
12 improve vaccine uptake. Parental SMS text message reminders will be sent using  
13  
14 'Message Media' software in a non-directive educational approach automatically to  
15  
16 the child's parent advising them that their child/adolescent is eligible for funded  
17  
18 influenza and where they can receive it. These will be timed to be sent prior to and  
19  
20 following scheduled WCH specialist appointments and will be sent up to two weeks  
21  
22 but no less than one week prior to the appointment. Each child will receive a  
23  
24 maximum of three SMS reminders, for appointments scheduled between the start of  
25  
26 the seasonal influenza vaccination season and the end of July. The second SMS will  
27  
28 be sent two weeks after the first SMS and the third SMS sent two weeks after the  
29  
30 second SMS. The first child will be enrolled on April 15th, 2021. Text messages will  
31  
32 cease if a parent replies to advise that the child is immunised and this is confirmed  
33  
34 on the AIR. Text messages will comprise: i) the influenza vaccination message  
35  
36 reminder text, ii) an option to reply if the vaccine has been received elsewhere.  
37  
38 Parents will be encouraged to engage with their child's specialist, GP or  
39  
40 immunisation provider to answer any related questions arising from the influenza  
41  
42 vaccination message. Parents may opt-out of further text messages at any time.  
43  
44  
45  
46  
47  
48  
49  
50  
51

52 At conclusion of the trial, parents in both trial arms will receive an SMS, to ask if the  
53  
54 child had received an influenza vaccine in 2021. All collected identifiable data will be  
55  
56 securely stored on a database held by the WCHN, with access to the database  
57  
58  
59  
60

1  
2 controlled by password protection. Any data presented will be de-identified prior to  
3  
4 presentation.  
5  
6  
7

### 8 Patient and public involvement

9  
10 Patient and public involvement will include influenza vaccine signage designed in  
11  
12 conjunction with the Flutext-4U Expert Advisory Group and WCH Consumer  
13  
14 Advisory Committee. Parents in both trial arms will receive a parental acceptability  
15  
16 survey. Study results will be communicated to key stakeholders and findings will also  
17  
18 be disseminated in peer reviewed scientific journals and presented at national and  
19  
20 international conferences.  
21  
22  
23  
24  
25

### 26 Study monitoring and surveillance

27  
28 Flutext-4U is a behavioural intervention and as such there are no risks or harms  
29  
30 associated with drugs, procedures or devices in this study. The assessment of  
31  
32 known potential risks and benefits of the intervention indicate negligible risk through  
33  
34 participation in this study. Any risk of psychosocial distress associated with receiving  
35  
36 a vaccine communication (SMS/letter/ reminder) or discussing vaccines is unlikely  
37  
38 and is outweighed by the anticipated benefits to the individual and or knowledge that  
39  
40 might reasonably be expected from the results. The risk of the intervention is  
41  
42 comparable to standard care. A risk assessment and management plan has been  
43  
44 developed for all stages of the trial from trial design through to reporting and  
45  
46 reflective of the nature of the trial as behavioural intervention. A Trial Management  
47  
48 Group comprising the chief investigator, project manager and study coordinator and  
49  
50 statistician will closely review all operational aspects of the conduct and progress of  
51  
52 the trial and a Trial Steering Committee comprising the investigator team and  
53  
54 specialist paediatricians from the study institution, will maintain clinical and ethical  
55  
56 oversight.  
57  
58  
59  
60



### Sample size and analysis plan

We plan to enrol at least 540 parents of children / adolescents medically at-risk receiving tertiary care at the WCH. In order to have 80% power to detect a 30% relative increase in the percentage of children vaccinated from 40% in the standard care arm to 52% in the trial arm containing all Flutext-4U components, a sample size of 270 children per group is required (two-tailed alpha = 0.05). Previous studies have shown a 30% to 70% relative increase following other immunisation interventions. A 30% relative increase in the percentage vaccinated would be considered clinically meaningful.

All analyses will be undertaken on an intention-to-treat basis according to a statistical analysis plan, pre-specified prior to database lock. For the primary outcome, the number and proportion of participants receiving influenza vaccination in each group will be compared between randomised groups using logistic regression, with adjustment made for age-group (<5, 5-14, >14 years). The effect of treatment will be described using an odds ratio with a 95% confidence interval. Subgroup analysis will examine the effect of paediatric subspecialty (diabetes, neurology, respiratory, gastroenterology, rheumatology, cardiology or other), age group (<5, 5-14, >14 to <18 years) and residential location (metropolitan, rural according to the predefined postcodes for metro and regional areas of South Australia) on the primary outcome. Secondary analyses will be performed using logistic regression for binary outcomes and a Cox proportional hazards model for time to event outcomes, again with adjustment for age group (<5, 5-14, >14 to <18 years). In all analyses, a two-sided p-value < 0.05 will be used to indicate statistical significance. No adjustment will be made for multiple pre-planned comparisons, as the overall comparison of vaccine

1 uptake is of primary interest. The study statistician undertaking analysis will remain  
2  
3  
4 blinded to trial intervention assignment.  
5  
6  
7

## 8 **Discussion**

9  
10 This study will assess the effectiveness of a structured multimodal strategy using  
11 evidence-based tools and targeting a paediatric hospital and parents of children with  
12 SRMC to increase child influenza immunisation coverage rates. The intervention  
13 combines primary care-level and parent-level interventions and was designed for  
14 delivery in conjunction with a tertiary-level environment.  
15  
16  
17  
18  
19  
20  
21  
22

23 Improving immunisation coverage in high-risk populations remains at the forefront of  
24 implementation research. Yet, investment into programs and research to ensure  
25 funded vaccines are administered to those who need them most has been limited.  
26  
27  
28  
29  
30  
31  
32  
33 Only 43.9% (WCH) children with SRMC received influenza vaccine in 2015, despite  
34 a funded influenza program for this at-risk group.(11)  
35

36 Many modifiable barriers to annual influenza immunisation exist and multimodal  
37 strategies using: i) practice-level or ii) patient (or parent)-level interventions have  
38 been shown to improve immunisation rates. Employing extensive pilot data obtained  
39 by our research from parents and healthcare workers we are uniquely placed to  
40 develop, implement and evaluate Flutext-4U. Flutext-4U is a structured multimodal  
41 strategy using evidence-based tools and targeting paediatric hospitals and parents of  
42 children with SRMC to increase child influenza immunisation coverage rates. Flutext-  
43 4U will be implemented at the WCH using a randomised controlled trial design  
44 followed by thorough evaluation.  
45  
46  
47  
48  
49  
50  
51  
52  
53  
54  
55  
56  
57

58 We are mindful of the inherent risk from contamination from intervention arm  
59 participants, particularly within medical risk groups due to parent interaction. To  
60

1  
2 minimise bias at the tertiary provider level and because randomising sub-specialists  
3  
4 would be impractical, with an almost certain chance of cross-contamination, both  
5  
6 intervention arms will receive standard care.  
7  
8  
9

10  
11 It is also important to collect data on parental acceptability of the intervention as this  
12  
13 will have the potential to inform any adaptations to the future implementation of the  
14  
15 intervention. Flutext-4U will develop coordinated approaches to immunising children  
16  
17 with SRMC and establish the evidence required to optimise paediatric influenza  
18  
19 immunisation strategies and campaigns. It will provide a model for future targeted  
20  
21 high-risk programs nationally.  
22  
23  
24  
25

26  
27 If the study demonstrates no negative effects, the intervention will be subsequently  
28  
29 implemented for all children with SRMC at the WCH. Any impact on coverage will  
30  
31 assist other Australian jurisdictions and national program directors in the  
32  
33 implementation of similar programs. Additionally, a focus on developing low-cost,  
34  
35 adaptable and scalable methods for improving coverage rates is expected to have  
36  
37 implications for many at-risk populations so that the intervention could be adapted  
38  
39 and tested in other populations.  
40  
41  
42  
43  
44

#### 45 **Ethics and dissemination**

46  
47 The protocol and all study materials have been reviewed and approved by the  
48  
49 Women's and Children's Health Network Human Research Ethics Committee  
50  
51 (HREC/20/WCHN/5). The trial will be conducted in compliance with the current  
52  
53 version of the protocol. Any change to the protocol document that affects the  
54  
55 scientific intent, trial design, participant safety, or may affect a participants  
56  
57 willingness to continue participation in the trial is considered an amendment, and will  
58  
59  
60

1  
2 be submitted to the HREC, for approval prior to being implemented. Following  
3  
4  
5  
6 completion of the trial, the results will be disseminated via peer reviewed  
7  
8  
9  
10 publication and at scientific meetings, professional and public forums. The results  
11  
12  
13 will be disseminated regardless of the magnitude or direction of effect.  
14  
15

16  
17 Authorship will be allocated using the guidelines for authorship defined by the  
18  
19  
20  
21 International Committees of Medical Journal Editors and the role of each  
22  
23  
24 author will be published in line with journal requirements. There are no plans  
25  
26  
27  
28 for the use of professional writers.  
29  
30  
31  
32  
33  
34  
35

### 36 **Authors' contributions**

37  
38 JT wrote the first draft with assistance from KH, TRS and HM. JF, JC, NS, AT, AK,  
39  
40 RC, MF, LF, MD and CB contributed to the manuscript and all authors approved the  
41  
42 final version for publication.  
43  
44  
45  
46

### 47 **Competing interests statement.**

48  
49 JT is an investigator on a project grant sponsored by Industry. Her institution has  
50  
51 received funding from Industry (GSK) for investigator led research. She does not  
52  
53 receive any personal payments from Industry. HM is an investigator on clinical  
54  
55 vaccine trials sponsored by Industry (Pfizer, GSK). Her institution receives funding  
56  
57  
58  
59  
60

1  
2 for Investigator led research from GSK, Pfizer, Sanofi-Pasteur. All other authors (KH,  
3  
4 TS, JF, JC, NS, AT, AK, RC, MF, LF, MD, CB) report no conflicts of interest.  
5  
6  
7

### 8 9 **Funding statement**

10 This work is supported by a Women's and Children's Hospital Foundation Grant.  
11  
12  
13

### 14 15 **Figure 1: Study design**

16 Footnote: SRMC: special risk medical condition.  
17  
18  
19  
20  
21  
22  
23  
24  
25  
26  
27  
28  
29  
30  
31  
32  
33  
34  
35  
36  
37  
38  
39  
40  
41  
42  
43  
44  
45  
46  
47  
48  
49  
50  
51  
52  
53  
54  
55  
56  
57  
58  
59  
60

Or peer review only

## References

1. Blyth CC, Macartney, K.K., McRae, J., Clark, J., Marshall, H.S., Buttery, J., Francis, J.R., Kotsimpos, T., Kelly, P.M., Allen, A.C. Influenza epidemiology, vaccine coverage and vaccine effectiveness in children admitted to sentinel Australian hospitals in 2017: Results from the PAEDS-FluCAN Collaboration. TO BE UPDATED. 2018.
2. Newall AT, Scuffham PA. Influenza-related disease: the cost to the Australian healthcare system. *Vaccine*. 2008;26(52):6818-23.
3. World Health Organisation. Vaccines against influenza WHO position paper - November 2012. *Wkly Epidemiol Rec*. 2012;87(47):461-76.
4. Gill PJ, Ashdown HF, Wang K, et al. Identification of children at risk of influenza-related complications in primary and ambulatory care: a systematic review and meta-analysis. *The Lancet Respiratory medicine*. 2015;3(2):139-49.
5. Tuckerman J, Misan S, Crawford NW, et al. Influenza in Children with Special Risk Medical Conditions: A Systematic Review and Meta-Analysis. *PIDJ*. 2019.
6. Australian Technical Advisory Group on Immunisation (ATAGI). The Australian Immunisation Handbook [Electronic book]. Canberra: Australian Government Department of Health; 2018 [Available from: <https://immunisationhandbook.health.gov.au/>].
7. Lakhani N, Clarke M, Mathew SM, et al. Retrospective review of factors associated with severe hospitalised community-acquired influenza in a tertiary paediatric hospital in South Australia. *Influenza and other respiratory viruses*. 2016;10(6):479-85.
8. Australian Technical Advisory Group on Immunisation (ATAGI). Statement on the Administration of Seasonal Influenza Vaccines in 2019. Canberra: Australian Government Department of Health; 5 April 2019 [Available from: <https://beta.health.gov.au/file/10519/download?token=1zBZrm6E>].
9. Blyth CC, Jacoby P, Effler PV, et al. Effectiveness of trivalent flu vaccine in healthy young children. *Pediatrics*. 2014;133(5):e1218-25.
10. Blyth CC, Jacoby P, Effler PV, et al. Influenza Vaccine Effectiveness and Uptake in Children at Risk of Severe Disease. *The Pediatric infectious disease journal*. 2016;35(3):309-15.
11. Tuckerman J, Misan S, Salih S, et al. Influenza vaccination: Uptake and associations in a cross-sectional study of children with special risk medical conditions. *Vaccine*. 2018;36(52):8138-47.
12. Newcombe J, Kaur R, Wood N, et al. Prevalence and determinants of influenza vaccine coverage at tertiary paediatric hospitals. *Vaccine*. 2014;32(48):6364-8.
13. Norman DA, Danchin M, Van Buynder P, et al. Caregiver's attitudes, beliefs, and experiences for influenza vaccination in Australian children with medical comorbidities. *Vaccine*. 2019;37(16):2244-8.
14. Pandolfi E, Marino MG, Carloni E, et al. The effect of physician's recommendation on seasonal influenza immunization in children with chronic diseases. *BMC Public Health*. 2012;12:984.(doi):10.1186/471-2458-12-984.
15. Esposito S, Marchisio P, Droghetti R, et al. Influenza vaccination coverage among children with high-risk medical conditions. *Vaccine*. 2006;24(24):5251-5. Epub 2006 Mar 31.
16. Daley MF, Beaty BL, Barrow J, et al. Missed opportunities for influenza vaccination in children with chronic medical conditions. *Archives of pediatrics & adolescent medicine*. 2005;159(10):986-91.
17. Romano M, Pandolfi E, Marino MG, et al. Seasonal and pandemic influenza vaccine: recommendations to families of at-risk children during the 2009-10 season. *Eur J Public Health*. 2012;22(6):821-4. doi: 10.1093/eurpub/cks005. Epub 2012 Feb 7.
18. Gnanasekaran SK, Finkelstein JA, Hohman K, et al. Parental perspectives on influenza vaccination among children with asthma. *Public health reports*. 2006;121(2):181-8.
19. Lin CJ, Zimmerman RK, Nowalk MP, et al. Parental perspectives on influenza vaccination of children with chronic medical conditions. *Journal of the National Medical Association*. 2006;98(2):148-53.
20. Peleg N, Zevit N, Shamir R, et al. Seasonal influenza vaccination rates and reasons for non-vaccination in children with gastrointestinal disorders. *Vaccine*. 2015;33(1):182-6.
21. Principi N, Esposito S. Pediatric influenza prevention and control. *Emerging infectious diseases*. 2004;10(4):574-80.

22. Lin CJ, Nowalk MP, Zimmerman RK, et al. Beliefs and attitudes about influenza immunization among parents of children with chronic medical conditions over a two-year period. *Journal of urban health : bulletin of the New York Academy of Medicine*. 2006;83(5):874-83.
23. Rodriguez-Rieiro C, Dominguez-Berjon MF, Esteban-Vasallo MD, et al. Vaccination coverage against 2009 seasonal influenza in chronically ill children and adults: analysis of population registries in primary care in Madrid (Spain). *Vaccine*. 2010;28(38):6203-9.
24. Norman DA, Barnes R, Pavlos R, et al. Improving Influenza Vaccination in Children With Comorbidities: A Systematic Review. *Pediatrics*. 2021;147(3).
25. Stephens A, Wynn C, Stockwell M. Understanding the Use of Digital Technology to Promote Human Papillomavirus Vaccination- A RE-AIM Framework Approach. *Human vaccines & immunotherapeutics*. 2019.
26. Regan AK, Bloomfield L, Peters I, et al. Randomized Controlled Trial of Text Message Reminders for Increasing Influenza Vaccination. *Annals of family medicine*. 2017;15(6):507-14.
27. Stockwell MS, Kharbanda EO, Martinez RA, et al. Effect of a text messaging intervention on influenza vaccination in an urban, low-income pediatric and adolescent population: a randomized controlled trial. *JAMA : the journal of the American Medical Association*. 2012;307(16):1702-8.
28. Stockwell MS, Hofstetter AM, DuRivage N, et al. Text message reminders for second dose of influenza vaccine: a randomized controlled trial. *Pediatrics*. 2015;135(1):e83-91.
29. European Centre for Disease Prevention and Control. Seasonal influenza vaccination in Europe. Vaccination recommendations and coverage rates in the EU Member States for eight influenza seasons: 2007–2008 to 2014–2015. Stockholm: ECDC; 2017.
30. European Centre for Disease Prevention and Control. Seasonal influenza vaccination in Europe - Overview of vaccination recommendations and coverage rates in the EU Member States for the 2012-13 influenza season. . Stockholm: ECDC; 2015.
31. Tuckerman J, Crawford NW, Marshall HS. Seasonal influenza vaccination for children with special risk medical conditions: does policy meet practice? *J Paediatr Child Health*. 2020;56(9):1388-95.
32. Stockwell MS, Kharbanda EO, Martinez RA, et al. Text4Health: impact of text message reminder-recalls for pediatric and adolescent immunizations. *American journal of public health*. 2012;102(2):e15-21.
33. Hofstetter AM, Vargas CY, Kennedy A, et al. Parental and provider preferences and concerns regarding text message reminder/recall for early childhood vaccinations. *Preventive medicine*. 2013;57(2):75-80.
34. Chamberlain AT, Seib K, Ault KA, et al. Improving influenza and Tdap vaccination during pregnancy: A cluster-randomized trial of a multi-component antenatal vaccine promotion package in late influenza season. *Vaccine*. 2015;33(30):3571-9.
35. Kaufman J, Attwell K, Tuckerman J, et al. Feasibility and acceptability of the multi-component P3-MumBubVax antenatal intervention to promote maternal and childhood vaccination: A pilot study. *Vaccine*. 2020;38(24):4024-31.
36. Newcombe J, Kaur R, Wood N, et al. Paediatrician beliefs and practices around influenza vaccination. *Journal of paediatrics and child health*. 2017;53(7):711-4.

## Acknowledgments

We acknowledge the assistance of the WCHN ICT Applications System Support, Corporate Administration Services: Jillian Edwards and Nicola Barzen; Medical Records Department: Denica Tohill and Immunisation Clinic: Breda MacDonald and Elisabeth Lay and members of the WCH Consumer Advisory Committee.

CCB is supported by a NHMRC emerging leadership fellowship APP1173163. TRS is supported by a NHMRC emerging leadership fellowship APP1173576.

For peer review only



1  
2  
3  
4  
5  
6  
7  
8  
9  
10  
11  
12  
13  
14  
15  
16  
17  
18  
19  
20  
21  
22  
23  
24  
25  
26  
27  
28  
29  
30  
31  
32  
33  
34  
35  
36  
37  
38  
39  
40  
41  
42  
43  
44  
45  
46  
47  
48  
49  
50  
51  
52  
53  
54  
55  
56  
57  
58  
59  
60

For peer review only

1  
2  
3  
4  
5  
6  
7  
8  
9  
10  
11  
12  
13  
14  
15  
16  
17  
18  
19  
20  
21  
22  
23  
24  
25  
26  
27  
28  
29  
30  
31  
32  
33  
34  
35  
36  
37  
38  
39  
40  
41  
42  
43  
44  
45  
46  
47  
48  
49  
50  
51  
52  
53  
54  
55  
56  
57  
58  
59  
60

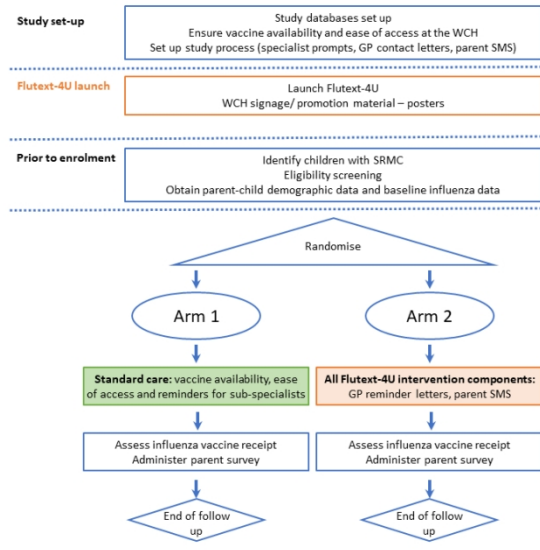

Figure 1: Study design

338x190mm (96 x 96 DPI)

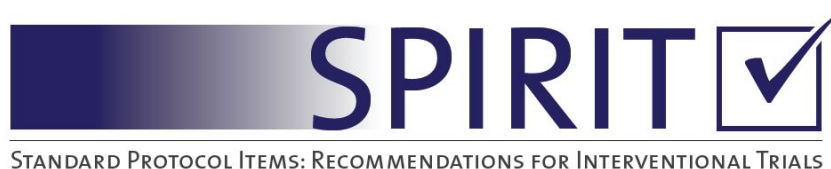

SPIRIT 2013 Checklist: Recommended items to address in a clinical trial protocol and related documents\*

| Section/item                      | Item No | Description                                                                                                                                                                                                                                                                              | Location in manuscript (page number)                  |
|-----------------------------------|---------|------------------------------------------------------------------------------------------------------------------------------------------------------------------------------------------------------------------------------------------------------------------------------------------|-------------------------------------------------------|
| <b>Administrative information</b> |         |                                                                                                                                                                                                                                                                                          |                                                       |
| Title                             | 1       | Descriptive title identifying the study design, population, interventions, and, if applicable, trial acronym                                                                                                                                                                             | 1                                                     |
| Trial registration                | 2a      | Trial identifier and registry name. If not yet registered, name of intended registry                                                                                                                                                                                                     | 4                                                     |
|                                   | 2b      | All items from the World Health Organization Trial Registration Data Set                                                                                                                                                                                                                 | Yes (available in trial register ACTRN12621000463875) |
| Protocol version                  | 3       | Date and version identifier                                                                                                                                                                                                                                                              | N/A                                                   |
| Funding                           | 4       | Sources and types of financial, material, and other support                                                                                                                                                                                                                              | 18                                                    |
| Roles and responsibilities        | 5a      | Names, affiliations, and roles of protocol contributors                                                                                                                                                                                                                                  | 17                                                    |
|                                   | 5b      | Name and contact information for the trial sponsor                                                                                                                                                                                                                                       | N/A                                                   |
|                                   | 5c      | Role of study sponsor and funders, if any, in study design; collection, management, analysis, and interpretation of data; writing of the report; and the decision to submit the report for publication, including whether they will have ultimate authority over any of these activities | N/A                                                   |
|                                   | 5d      | Composition, roles, and responsibilities of the coordinating centre, steering committee, endpoint adjudication committee, data management team, and other individuals or groups overseeing the trial, if applicable (see Item 21a for data monitoring committee)                         | 14                                                    |
| <b>Introduction</b>               |         |                                                                                                                                                                                                                                                                                          |                                                       |

|    |                                                           |     |                                                                                                                                                                                                                                                                                                                                                                                |       |  |
|----|-----------------------------------------------------------|-----|--------------------------------------------------------------------------------------------------------------------------------------------------------------------------------------------------------------------------------------------------------------------------------------------------------------------------------------------------------------------------------|-------|--|
| 1  |                                                           |     |                                                                                                                                                                                                                                                                                                                                                                                |       |  |
| 2  | Background and rationale                                  | 6a  | Description of research question and justification for undertaking the trial, including summary of relevant studies (published and unpublished) examining benefits and harms for each intervention                                                                                                                                                                             | 3 & 6 |  |
| 3  |                                                           |     |                                                                                                                                                                                                                                                                                                                                                                                |       |  |
| 4  |                                                           |     |                                                                                                                                                                                                                                                                                                                                                                                |       |  |
| 5  |                                                           |     |                                                                                                                                                                                                                                                                                                                                                                                |       |  |
| 6  |                                                           |     |                                                                                                                                                                                                                                                                                                                                                                                |       |  |
| 7  |                                                           | 6b  | Explanation for choice of comparators                                                                                                                                                                                                                                                                                                                                          | 8 & 9 |  |
| 8  | Objectives                                                | 7   | Specific objectives or hypotheses                                                                                                                                                                                                                                                                                                                                              | 10    |  |
| 9  |                                                           |     |                                                                                                                                                                                                                                                                                                                                                                                |       |  |
| 10 | Trial design                                              | 8   | Description of trial design including type of trial (eg, parallel group, crossover, factorial, single group), allocation ratio, and framework (eg, superiority, equivalence, noninferiority, exploratory)                                                                                                                                                                      | 9     |  |
| 11 |                                                           |     |                                                                                                                                                                                                                                                                                                                                                                                |       |  |
| 12 |                                                           |     |                                                                                                                                                                                                                                                                                                                                                                                |       |  |
| 13 |                                                           |     |                                                                                                                                                                                                                                                                                                                                                                                |       |  |
| 14 |                                                           |     |                                                                                                                                                                                                                                                                                                                                                                                |       |  |
| 15 |                                                           |     |                                                                                                                                                                                                                                                                                                                                                                                |       |  |
| 16 |                                                           |     |                                                                                                                                                                                                                                                                                                                                                                                |       |  |
| 17 |                                                           |     |                                                                                                                                                                                                                                                                                                                                                                                |       |  |
| 18 | <b>Methods: Participants, interventions, and outcomes</b> |     |                                                                                                                                                                                                                                                                                                                                                                                |       |  |
| 19 | Study setting                                             | 9   | Description of study settings (eg, community clinic, academic hospital) and list of countries where data will be collected. Reference to where list of study sites can be obtained                                                                                                                                                                                             | 9+10  |  |
| 20 |                                                           |     |                                                                                                                                                                                                                                                                                                                                                                                |       |  |
| 21 |                                                           |     |                                                                                                                                                                                                                                                                                                                                                                                |       |  |
| 22 | Eligibility criteria                                      | 10  | Inclusion and exclusion criteria for participants. If applicable, eligibility criteria for study centres and individuals who will perform the interventions (eg, surgeons, psychotherapists)                                                                                                                                                                                   | 12    |  |
| 23 |                                                           |     |                                                                                                                                                                                                                                                                                                                                                                                |       |  |
| 24 |                                                           |     |                                                                                                                                                                                                                                                                                                                                                                                |       |  |
| 25 | Interventions                                             | 11a | Interventions for each group with sufficient detail to allow replication, including how and when they will be administered                                                                                                                                                                                                                                                     | 13    |  |
| 26 |                                                           |     |                                                                                                                                                                                                                                                                                                                                                                                |       |  |
| 27 |                                                           | 11b | Criteria for discontinuing or modifying allocated interventions for a given trial participant (eg, drug dose change in response to harms, participant request, or improving/worsening disease)                                                                                                                                                                                 | 13    |  |
| 28 |                                                           |     |                                                                                                                                                                                                                                                                                                                                                                                |       |  |
| 29 |                                                           |     |                                                                                                                                                                                                                                                                                                                                                                                |       |  |
| 30 |                                                           |     |                                                                                                                                                                                                                                                                                                                                                                                |       |  |
| 31 |                                                           | 11c | Strategies to improve adherence to intervention protocols, and any procedures for monitoring adherence (eg, drug tablet return, laboratory tests)                                                                                                                                                                                                                              | n/a   |  |
| 32 |                                                           |     |                                                                                                                                                                                                                                                                                                                                                                                |       |  |
| 33 |                                                           |     |                                                                                                                                                                                                                                                                                                                                                                                |       |  |
| 34 |                                                           |     |                                                                                                                                                                                                                                                                                                                                                                                |       |  |
| 35 |                                                           | 11d | Relevant concomitant care and interventions that are permitted or prohibited during the trial                                                                                                                                                                                                                                                                                  | n/a   |  |
| 36 |                                                           |     |                                                                                                                                                                                                                                                                                                                                                                                |       |  |
| 37 |                                                           |     |                                                                                                                                                                                                                                                                                                                                                                                |       |  |
| 38 | Outcomes                                                  | 12  | Primary, secondary, and other outcomes, including the specific measurement variable (eg, systolic blood pressure), analysis metric (eg, change from baseline, final value, time to event), method of aggregation (eg, median, proportion), and time point for each outcome. Explanation of the clinical relevance of chosen efficacy and harm outcomes is strongly recommended | 10/11 |  |
| 39 |                                                           |     |                                                                                                                                                                                                                                                                                                                                                                                |       |  |
| 40 |                                                           |     |                                                                                                                                                                                                                                                                                                                                                                                |       |  |
| 41 |                                                           |     |                                                                                                                                                                                                                                                                                                                                                                                |       |  |
| 42 |                                                           |     |                                                                                                                                                                                                                                                                                                                                                                                |       |  |
| 43 |                                                           |     |                                                                                                                                                                                                                                                                                                                                                                                |       |  |
| 44 |                                                           |     |                                                                                                                                                                                                                                                                                                                                                                                |       |  |
| 45 |                                                           |     |                                                                                                                                                                                                                                                                                                                                                                                |       |  |
| 46 |                                                           |     |                                                                                                                                                                                                                                                                                                                                                                                |       |  |
| 47 |                                                           |     |                                                                                                                                                                                                                                                                                                                                                                                |       |  |
| 48 |                                                           |     |                                                                                                                                                                                                                                                                                                                                                                                |       |  |
| 49 |                                                           |     |                                                                                                                                                                                                                                                                                                                                                                                |       |  |
| 50 |                                                           |     |                                                                                                                                                                                                                                                                                                                                                                                |       |  |
| 51 |                                                           |     |                                                                                                                                                                                                                                                                                                                                                                                |       |  |
| 52 |                                                           |     |                                                                                                                                                                                                                                                                                                                                                                                |       |  |
| 53 |                                                           |     |                                                                                                                                                                                                                                                                                                                                                                                |       |  |
| 54 |                                                           |     |                                                                                                                                                                                                                                                                                                                                                                                |       |  |
| 55 |                                                           |     |                                                                                                                                                                                                                                                                                                                                                                                |       |  |
| 56 |                                                           |     |                                                                                                                                                                                                                                                                                                                                                                                |       |  |
| 57 |                                                           |     |                                                                                                                                                                                                                                                                                                                                                                                |       |  |
| 58 |                                                           |     |                                                                                                                                                                                                                                                                                                                                                                                |       |  |
| 59 |                                                           |     |                                                                                                                                                                                                                                                                                                                                                                                |       |  |
| 60 |                                                           |     |                                                                                                                                                                                                                                                                                                                                                                                |       |  |

|    |                                                                     |     |                                                             |         |
|----|---------------------------------------------------------------------|-----|-------------------------------------------------------------|---------|
| 1  |                                                                     |     |                                                             |         |
| 2  | Participant                                                         | 13  | Time schedule of enrolment, interventions (including        | 12/13   |
| 3  | timeline                                                            |     | any run-ins and washouts), assessments, and visits for      |         |
| 4  |                                                                     |     | participants. A schematic diagram is highly                 |         |
| 5  |                                                                     |     | recommended (see Figure)                                    |         |
| 6  |                                                                     |     |                                                             |         |
| 7  | Sample size                                                         | 14  | Estimated number of participants needed to achieve          | 14/15   |
| 8  |                                                                     |     | study objectives and how it was determined, including       |         |
| 9  |                                                                     |     | clinical and statistical assumptions supporting any         |         |
| 10 |                                                                     |     | sample size calculations                                    |         |
| 11 |                                                                     |     |                                                             |         |
| 12 |                                                                     |     |                                                             |         |
| 13 | Recruitment                                                         | 15  | Strategies for achieving adequate participant enrolment     | 12      |
| 14 |                                                                     |     | to reach target sample size                                 |         |
| 15 |                                                                     |     |                                                             |         |
| 16 | <b>Methods: Assignment of interventions (for controlled trials)</b> |     |                                                             |         |
| 17 | <b>Allocation:</b>                                                  |     |                                                             |         |
| 18 |                                                                     |     |                                                             |         |
| 19 | Sequence                                                            | 16a | Method of generating the allocation sequence (eg,           | 11      |
| 20 | generation                                                          |     | computer-generated random numbers), and list of any         |         |
| 21 |                                                                     |     | factors for stratification. To reduce predictability of a   |         |
| 22 |                                                                     |     | random sequence, details of any planned restriction         |         |
| 23 |                                                                     |     | (eg, blocking) should be provided in a separate             |         |
| 24 |                                                                     |     | document that is unavailable to those who enrol             |         |
| 25 |                                                                     |     | participants or assign interventions                        |         |
| 26 |                                                                     |     |                                                             |         |
| 27 | Allocation                                                          | 16b | Mechanism of implementing the allocation sequence           | 11      |
| 28 | concealment                                                         |     | (eg, central telephone; sequentially numbered, opaque,      |         |
| 29 | mechanism                                                           |     | sealed envelopes), describing any steps to conceal the      |         |
| 30 |                                                                     |     | sequence until interventions are assigned                   |         |
| 31 |                                                                     |     |                                                             |         |
| 32 | Implementation                                                      | 16c | Who will generate the allocation sequence, who will         | 11      |
| 33 |                                                                     |     | enrol participants, and who will assign participants to     |         |
| 34 |                                                                     |     | interventions                                               |         |
| 35 |                                                                     |     |                                                             |         |
| 36 | Blinding                                                            | 17a | Who will be blinded after assignment to interventions       | 11 & 14 |
| 37 | (masking)                                                           |     | (eg, trial participants, care providers, outcome            |         |
| 38 |                                                                     |     | assessors, data analysts), and how                          |         |
| 39 |                                                                     |     |                                                             |         |
| 40 |                                                                     | 17b | If blinded, circumstances under which unblinding is         | 14      |
| 41 |                                                                     |     | permissible, and procedure for revealing a participant's    |         |
| 42 |                                                                     |     | allocated intervention during the trial                     |         |
| 43 |                                                                     |     |                                                             |         |
| 44 |                                                                     |     |                                                             |         |
| 45 |                                                                     |     |                                                             |         |
| 46 |                                                                     |     |                                                             |         |
| 47 |                                                                     |     |                                                             |         |
| 48 |                                                                     |     |                                                             |         |
| 49 | <b>Methods: Data collection, management, and analysis</b>           |     |                                                             |         |
| 50 |                                                                     |     |                                                             |         |
| 51 | Data collection                                                     | 18a | Plans for assessment and collection of outcome,             | 12/13   |
| 52 | methods                                                             |     | baseline, and other trial data, including any related       |         |
| 53 |                                                                     |     | processes to promote data quality (eg, duplicate            |         |
| 54 |                                                                     |     | measurements, training of assessors) and a description      |         |
| 55 |                                                                     |     | of study instruments (eg, questionnaires, laboratory        |         |
| 56 |                                                                     |     | tests) along with their reliability and validity, if known. |         |
| 57 |                                                                     |     | Reference to where data collection forms can be found,      |         |
| 58 |                                                                     |     | if not in the protocol                                      |         |
| 59 |                                                                     |     |                                                             |         |
| 60 |                                                                     |     |                                                             |         |

|    |                                 |     |                                                                                                                                                                                                                                                                                                                                       |       |
|----|---------------------------------|-----|---------------------------------------------------------------------------------------------------------------------------------------------------------------------------------------------------------------------------------------------------------------------------------------------------------------------------------------|-------|
| 1  |                                 |     |                                                                                                                                                                                                                                                                                                                                       |       |
| 2  |                                 | 18b | Plans to promote participant retention and complete follow-up, including list of any outcome data to be collected for participants who discontinue or deviate from intervention protocols                                                                                                                                             | n/a   |
| 3  |                                 |     |                                                                                                                                                                                                                                                                                                                                       |       |
| 4  |                                 |     |                                                                                                                                                                                                                                                                                                                                       |       |
| 5  |                                 |     |                                                                                                                                                                                                                                                                                                                                       |       |
| 6  |                                 |     |                                                                                                                                                                                                                                                                                                                                       |       |
| 7  |                                 |     |                                                                                                                                                                                                                                                                                                                                       |       |
| 8  | Data management                 | 19  | Plans for data entry, coding, security, and storage, including any related processes to promote data quality (eg, double data entry; range checks for data values). Reference to where details of data management procedures can be found, if not in the protocol                                                                     | 13/15 |
| 9  |                                 |     |                                                                                                                                                                                                                                                                                                                                       |       |
| 10 |                                 |     |                                                                                                                                                                                                                                                                                                                                       |       |
| 11 |                                 |     |                                                                                                                                                                                                                                                                                                                                       |       |
| 12 |                                 |     |                                                                                                                                                                                                                                                                                                                                       |       |
| 13 |                                 |     |                                                                                                                                                                                                                                                                                                                                       |       |
| 14 | Statistical methods             | 20a | Statistical methods for analysing primary and secondary outcomes. Reference to where other details of the statistical analysis plan can be found, if not in the protocol                                                                                                                                                              | 15    |
| 15 |                                 |     |                                                                                                                                                                                                                                                                                                                                       |       |
| 16 |                                 |     |                                                                                                                                                                                                                                                                                                                                       |       |
| 17 |                                 |     |                                                                                                                                                                                                                                                                                                                                       |       |
| 18 |                                 |     |                                                                                                                                                                                                                                                                                                                                       |       |
| 19 |                                 |     |                                                                                                                                                                                                                                                                                                                                       |       |
| 20 |                                 | 20b | Methods for any additional analyses (eg, subgroup and adjusted analyses)                                                                                                                                                                                                                                                              | 15    |
| 21 |                                 |     |                                                                                                                                                                                                                                                                                                                                       |       |
| 22 |                                 |     |                                                                                                                                                                                                                                                                                                                                       |       |
| 23 |                                 |     |                                                                                                                                                                                                                                                                                                                                       |       |
| 24 |                                 | 20c | Definition of analysis population relating to protocol non-adherence (eg, as randomised analysis), and any statistical methods to handle missing data (eg, multiple imputation)                                                                                                                                                       | 15    |
| 25 |                                 |     |                                                                                                                                                                                                                                                                                                                                       |       |
| 26 |                                 |     |                                                                                                                                                                                                                                                                                                                                       |       |
| 27 |                                 |     |                                                                                                                                                                                                                                                                                                                                       |       |
| 28 |                                 |     |                                                                                                                                                                                                                                                                                                                                       |       |
| 29 | <b>Methods: Monitoring</b>      |     |                                                                                                                                                                                                                                                                                                                                       |       |
| 30 |                                 |     |                                                                                                                                                                                                                                                                                                                                       |       |
| 31 | Data monitoring                 | 21a | Composition of data monitoring committee (DMC); summary of its role and reporting structure; statement of whether it is independent from the sponsor and competing interests; and reference to where further details about its charter can be found, if not in the protocol. Alternatively, an explanation of why a DMC is not needed | n/a   |
| 32 |                                 |     |                                                                                                                                                                                                                                                                                                                                       |       |
| 33 |                                 |     |                                                                                                                                                                                                                                                                                                                                       |       |
| 34 |                                 |     |                                                                                                                                                                                                                                                                                                                                       |       |
| 35 |                                 |     |                                                                                                                                                                                                                                                                                                                                       |       |
| 36 |                                 |     |                                                                                                                                                                                                                                                                                                                                       |       |
| 37 |                                 |     |                                                                                                                                                                                                                                                                                                                                       |       |
| 38 |                                 |     |                                                                                                                                                                                                                                                                                                                                       |       |
| 39 |                                 |     |                                                                                                                                                                                                                                                                                                                                       |       |
| 40 |                                 |     |                                                                                                                                                                                                                                                                                                                                       |       |
| 41 |                                 | 21b | Description of any interim analyses and stopping guidelines, including who will have access to these interim results and make the final decision to terminate the trial                                                                                                                                                               | n/a   |
| 42 |                                 |     |                                                                                                                                                                                                                                                                                                                                       |       |
| 43 |                                 |     |                                                                                                                                                                                                                                                                                                                                       |       |
| 44 |                                 |     |                                                                                                                                                                                                                                                                                                                                       |       |
| 45 |                                 |     |                                                                                                                                                                                                                                                                                                                                       |       |
| 46 | Harms                           | 22  | Plans for collecting, assessing, reporting, and managing solicited and spontaneously reported adverse events and other unintended effects of trial interventions or trial conduct                                                                                                                                                     | 10    |
| 47 |                                 |     |                                                                                                                                                                                                                                                                                                                                       |       |
| 48 |                                 |     |                                                                                                                                                                                                                                                                                                                                       |       |
| 49 |                                 |     |                                                                                                                                                                                                                                                                                                                                       |       |
| 50 |                                 |     |                                                                                                                                                                                                                                                                                                                                       |       |
| 51 |                                 |     |                                                                                                                                                                                                                                                                                                                                       |       |
| 52 | Auditing                        | 23  | Frequency and procedures for auditing trial conduct, if any, and whether the process will be independent from investigators and the sponsor                                                                                                                                                                                           | n/a   |
| 53 |                                 |     |                                                                                                                                                                                                                                                                                                                                       |       |
| 54 |                                 |     |                                                                                                                                                                                                                                                                                                                                       |       |
| 55 |                                 |     |                                                                                                                                                                                                                                                                                                                                       |       |
| 56 |                                 |     |                                                                                                                                                                                                                                                                                                                                       |       |
| 57 | <b>Ethics and dissemination</b> |     |                                                                                                                                                                                                                                                                                                                                       |       |
| 58 |                                 |     |                                                                                                                                                                                                                                                                                                                                       |       |
| 59 |                                 |     |                                                                                                                                                                                                                                                                                                                                       |       |
| 60 |                                 |     |                                                                                                                                                                                                                                                                                                                                       |       |

|    |                               |     |                                                                                                                                                                                                                                                                                     |                                    |
|----|-------------------------------|-----|-------------------------------------------------------------------------------------------------------------------------------------------------------------------------------------------------------------------------------------------------------------------------------------|------------------------------------|
| 1  |                               |     |                                                                                                                                                                                                                                                                                     |                                    |
| 2  | Research ethics approval      | 24  | Plans for seeking research ethics committee/institutional review board (REC/IRB) approval                                                                                                                                                                                           | 4 & 10                             |
| 3  |                               |     |                                                                                                                                                                                                                                                                                     |                                    |
| 4  |                               |     |                                                                                                                                                                                                                                                                                     |                                    |
| 5  |                               |     |                                                                                                                                                                                                                                                                                     |                                    |
| 6  | Protocol amendments           | 25  | Plans for communicating important protocol modifications (eg, changes to eligibility criteria, outcomes, analyses) to relevant parties (eg, investigators, REC/IRBs, trial participants, trial registries, journals, regulators)                                                    | 17                                 |
| 7  |                               |     |                                                                                                                                                                                                                                                                                     |                                    |
| 8  |                               |     |                                                                                                                                                                                                                                                                                     |                                    |
| 9  |                               |     |                                                                                                                                                                                                                                                                                     |                                    |
| 10 |                               |     |                                                                                                                                                                                                                                                                                     |                                    |
| 11 |                               |     |                                                                                                                                                                                                                                                                                     |                                    |
| 12 |                               |     |                                                                                                                                                                                                                                                                                     |                                    |
| 13 | Consent or assent             | 26a | Who will obtain informed consent or assent from potential trial participants or authorised surrogates, and how (see Item 32)                                                                                                                                                        | 12                                 |
| 14 |                               |     |                                                                                                                                                                                                                                                                                     |                                    |
| 15 |                               |     |                                                                                                                                                                                                                                                                                     |                                    |
| 16 |                               |     |                                                                                                                                                                                                                                                                                     |                                    |
| 17 |                               |     |                                                                                                                                                                                                                                                                                     |                                    |
| 18 |                               | 26b | Additional consent provisions for collection and use of participant data and biological specimens in ancillary studies, if applicable                                                                                                                                               | n/a                                |
| 19 |                               |     |                                                                                                                                                                                                                                                                                     |                                    |
| 20 |                               |     |                                                                                                                                                                                                                                                                                     |                                    |
| 21 |                               |     |                                                                                                                                                                                                                                                                                     |                                    |
| 22 | Confidentiality               | 27  | How personal information about potential and enrolled participants will be collected, shared, and maintained in order to protect confidentiality before, during, and after the trial                                                                                                | 13                                 |
| 23 |                               |     |                                                                                                                                                                                                                                                                                     |                                    |
| 24 |                               |     |                                                                                                                                                                                                                                                                                     |                                    |
| 25 |                               |     |                                                                                                                                                                                                                                                                                     |                                    |
| 26 |                               |     |                                                                                                                                                                                                                                                                                     |                                    |
| 27 |                               |     |                                                                                                                                                                                                                                                                                     |                                    |
| 28 | Declaration of interests      | 28  | Financial and other competing interests for principal investigators for the overall trial and each study site                                                                                                                                                                       | 18                                 |
| 29 |                               |     |                                                                                                                                                                                                                                                                                     |                                    |
| 30 |                               |     |                                                                                                                                                                                                                                                                                     |                                    |
| 31 | Access to data                | 29  | Statement of who will have access to the final trial dataset, and disclosure of contractual agreements that limit such access for investigators                                                                                                                                     |                                    |
| 32 |                               |     |                                                                                                                                                                                                                                                                                     |                                    |
| 33 |                               |     |                                                                                                                                                                                                                                                                                     |                                    |
| 34 |                               |     |                                                                                                                                                                                                                                                                                     |                                    |
| 35 | Ancillary and post-trial care | 30  | Provisions, if any, for ancillary and post-trial care, and for compensation to those who suffer harm from trial participation                                                                                                                                                       | n/a                                |
| 36 |                               |     |                                                                                                                                                                                                                                                                                     |                                    |
| 37 |                               |     |                                                                                                                                                                                                                                                                                     |                                    |
| 38 |                               |     |                                                                                                                                                                                                                                                                                     |                                    |
| 39 |                               |     |                                                                                                                                                                                                                                                                                     |                                    |
| 40 | Dissemination policy          | 31a | Plans for investigators and sponsor to communicate trial results to participants, healthcare professionals, the public, and other relevant groups (eg, via publication, reporting in results databases, or other data sharing arrangements), including any publication restrictions | 17                                 |
| 41 |                               |     |                                                                                                                                                                                                                                                                                     |                                    |
| 42 |                               |     |                                                                                                                                                                                                                                                                                     |                                    |
| 43 |                               |     |                                                                                                                                                                                                                                                                                     |                                    |
| 44 |                               |     |                                                                                                                                                                                                                                                                                     |                                    |
| 45 |                               |     |                                                                                                                                                                                                                                                                                     |                                    |
| 46 |                               |     |                                                                                                                                                                                                                                                                                     |                                    |
| 47 |                               | 31b | Authorship eligibility guidelines and any intended use of professional writers                                                                                                                                                                                                      | 17/18                              |
| 48 |                               |     |                                                                                                                                                                                                                                                                                     |                                    |
| 49 |                               |     |                                                                                                                                                                                                                                                                                     |                                    |
| 50 |                               | 31c | Plans, if any, for granting public access to the full protocol, participant-level dataset, and statistical code                                                                                                                                                                     | 18                                 |
| 51 |                               |     |                                                                                                                                                                                                                                                                                     |                                    |
| 52 |                               |     |                                                                                                                                                                                                                                                                                     |                                    |
| 53 | <b>Appendices</b>             |     |                                                                                                                                                                                                                                                                                     |                                    |
| 54 |                               |     |                                                                                                                                                                                                                                                                                     |                                    |
| 55 | Informed consent materials    | 32  | Model consent form and other related documentation given to participants and authorised surrogates                                                                                                                                                                                  | Provided as supplementary material |
| 56 |                               |     |                                                                                                                                                                                                                                                                                     |                                    |
| 57 |                               |     |                                                                                                                                                                                                                                                                                     |                                    |
| 58 |                               |     |                                                                                                                                                                                                                                                                                     |                                    |
| 59 |                               |     |                                                                                                                                                                                                                                                                                     |                                    |
| 60 |                               |     |                                                                                                                                                                                                                                                                                     |                                    |

|                            |                      |    |                                                                                                                                                                                                |     |
|----------------------------|----------------------|----|------------------------------------------------------------------------------------------------------------------------------------------------------------------------------------------------|-----|
| 1<br>2<br>3<br>4<br>5<br>6 | Biological specimens | 33 | Plans for collection, laboratory evaluation, and storage of biological specimens for genetic or molecular analysis in the current trial and for future use in ancillary studies, if applicable | n/a |
|----------------------------|----------------------|----|------------------------------------------------------------------------------------------------------------------------------------------------------------------------------------------------|-----|

7 \*It is strongly recommended that this checklist be read in conjunction with the SPIRIT 2013  
8 Explanation & Elaboration for important clarification on the items. Amendments to the  
9 protocol should be tracked and dated. The SPIRIT checklist is copyrighted by the SPIRIT  
10 Group under the Creative Commons "[Attribution-NonCommercial-NoDerivs 3.0 Unported](#)"  
11 license.  
12  
13  
14  
15  
16  
17  
18  
19  
20  
21  
22  
23  
24  
25  
26  
27  
28  
29  
30  
31  
32  
33  
34  
35  
36  
37  
38  
39  
40  
41  
42  
43  
44  
45  
46  
47  
48  
49  
50  
51  
52  
53  
54  
55  
56  
57  
58  
59  
60

For peer review only
